# Supplementary material for: Spatiotemporal recruitment of RhoGTPase protein GRAF inhibits actomyosin ring constriction in Drosophila cellularization
Source: eLife. 2021 Apr 9;10:e63535. doi: 10.7554/eLife.63535 (PMC8081525; doi:10.7554/eLife.63535)
Supplement: Figure 1—source data 1. [file elife-63535-fig1-data1.xlsx]

## Sheet: Figure 1-source data
Figure 1-source data 1E
Control early	Grafi early	GrafCR57 early	Control mid	Grafi mid	GrafCR57 mid	Control late	Grafi late	GrafCR57 late
29.125	17.578	15.714	22.787	12.868	10.098	17.023	4.979	1.924
26.923	17.387	15.232	17.502	11.776	10.348	13.27	5.783	0.846
28.78	18.804	13.189	16.831	12.58	13.957	16.334	5.591	1.635
25.621	13.825	16.91	19.206	16.065	14.898	12.657	3.542	2.52
24.778	17.693	14.635	15.893	11.221	9.829	14.84	3.657	0.866
25.142	16.87	17.508	20.699	12.198	10.617	15.223	4.04	2.308
27.459	15.453	14.018	18.976	15.395	14.283	11.776	4.328	0.731
26.559	14.074	16.582	17.885	13.021	8.025	14.476	4.749	0.904
31.48	14.725	18.857	19.378	17.176	15.339	12.849	6.836	1.539
27.957	12.523	15.001	18.382	14.055	18.181	14.534	6.108	1.924
20.259	21.465	17.469	19.206	9.019	14.065	10.11	3.159	1.501
15.663	19.244	18.527	20.01	8.483	12.237	10.149	6.089	1.385
21.657	15.242	14.025	19.321	9.517	13.065	13.078	5.974	2.02
21.657	20.661	16.642	21.599	9.325	8.139	12.198	4.883	0.923
21.236	13.423	17.431	19.914	8.406	10.236	10.283	7.2	0.596
16.946	16.946	16.18	22.595	10.819	10.467	10.206	8.272	1.154
18.976	17.731	16.796	17.08	8.578	7.062	12.408	4.308	0.827
18.516	16.755	19.605	18.114	9.076	17.375	10.359	5.074	0.962
20.374	11.355	18.046	22.308	8.349	9.197	11.815	5.898	0.866
18.746	14.706	20.567	21.025	11.278	15.662	9.995	4.059	1.424
19.321	16.161	11.676	19.646	13.059	9.32	16.831	6.147	1.385
24.989	18.229	16.35	19.512	14.246	7.249	14.419	5.285	1.847
22.959	15.414	20.043	21.638	15.185	8.361	11.891	4.059	1.789
22.499	14.246	17.792	19.857	10.876	7.115	13.978	6.568	2.001
26.75	10.512	14.946	20.661	12.466	8.495	14.744	7.142	1.654
25.64	17.961	10.618	18.823	11.278	6.597	13.921	6.472	1.712
23.763	18.612	15.388	18.134	14.036	5.35	14.457	4.998	1.231
21.772	20.355	12.483	18.919	17.559	10.72	15.414	4.213	2.905
24.606	19.455	15.753	19.608	15.357	5.734	12.485	2.681	1.097
25.161	16.085	12.214	17.636	12.293	9.55	14.821	3.217	1.52
23.304	12.236	12.998	20.01	14.017	10.562	10.149	3.676	0.827
20.278	11.853	13.767	21.829	12.504	12.197	13.461	2.26	0.769
21.446	15.548	13.632	24.491	11.412	8.542	11.01	1.972	0.981
20.623	15.778	7.364	23.17	10.417	9.177	9.134	1.762	0.404
24.108	13.863	10.844	20.45	12.351	12.351	11.604	1.991	0.712
26.923	16.257	15.343	22.155	10.57	7.561	8.617	4.691	0.269
21.714	10.321	9.421	22.365	9.766	11.005	7.544	2.183	0.519
19.206	13.366	17.785	21.867	15.434	13.044	7.315	2.164	1.077
20.431	12.676	10.306	19.531	13.155	11.255	9.21	2.757	0.654
23.284	16.889	11.383	20.719	9.191	10.023	10.015	2.202	0.327
24.835	14.093	12.407	18.057	8.425	11.081	15.548	3.332	0.501
24.759	19.34	11.427	20.182	11.451	10.098	11.795	5.113	1.889
23.533	18.038	15.172	16.142	13.289	13.701	12.236	3.121	0.501
20.642	17.521	14.231	17.693	12.466	9.038	10.819	3.083	1.118
20.604	12.025	11.773	19.799	14.151	9.173	13.538	4.174	0.366
21.408	15.414	13.252	18.402	13.289	12.295	12.102	4.04	0.713
21.599	16.659	11.101	17.157	7.717	13.065	13.806	2.068	0.675
19.838	15.051	9.487	17.999	10.972	7.458	13.576	3.236	0.829
21.121	18.172	15.076	14.17	12.868	8.209	10.895	4.442	0.578
20.738	10.436	12.311	18.191	9.842	10.772	12.619	3.562	0.289
23.782	18.038	9.006	15.51	8.444	4.021	9.689	1.877	0.923
22.921	19.206	7.335	16.142	8.176	6.022	7.276	0.804	0.847
23.323	17.502	10.945	18.095	8.77	7.272	10.072	1.302	0.808
22.059	17.195	8.699	16.525	7.066	5.156	7.181	2.911	0.962
20.412	14.974	11.137	18.555	10.646	6.522	6.185	2.642	2.078
21.236	16.429	11.099	22.136	11.087	5.56	8.061	0.996	1.231
24.931	17.368	9.812	17.023	12.063	8.407	6.396	1.225	1.193
26.693	21.389	12.27	16.908	9.057	6.426	8.215	1.915	1.077
22.461	18.382	10.004	17.406	7.832	5.964	6.51	1.743	0.693
21.427	15.797	9.179	14.897	6.798	4.617	7.372	2.834	0.981
