# Supplementary material for: Spatiotemporal recruitment of RhoGTPase protein GRAF inhibits actomyosin ring constriction in Drosophila cellularization
Source: eLife. 2021 Apr 9;10:e63535. doi: 10.7554/eLife.63535 (PMC8081525; doi:10.7554/eLife.63535)
Supplement: Figure 2—figure supplement 1—source data 1. [file elife-63535-fig2-figsupp1-data1.xlsx]

## Sheet: Figure 2-figure supplement 1
Figure 2-figure supplement 1B
Control	Grafi
5.23424	1.0502
5.7183	0.944016
5.51136	1.09255
5.45767	0.964713
5.46797	0.93826
5.2553	1.24667
4.89947	1.11442
5.46982	1.21915
5.02676	1.22131
4.9871	1.21662
2.1551	2.49186
2.09024	2.33116
2.21421	2.35054
2.18206	2.44025
2.21862	2.0701
7.41193	3.91784
6.5	3.836
6.08106	4.04512
6.75375	4.01559
6.72812	3.8476
5.30324	1.95064
5.00423	2.07301
5.04014	1.95503
5.04232	2.01206
5.01877	1.94017
4.9846	1.27617
4.64018	1.2684
4.98317	1.36156
4.55552	1.18117
4.55987	1.28473
3.05107	1.90222
2.84706	1.78907
2.84927	1.92027
2.81319	1.87368
2.71725	1.99304
4.50441	1.25227
4.59767	1.14762
4.52237	1.17843
4.35175	1.13813
4.2927	1.2559
3.91361	3.68046
3.94032	4.04427
3.77724	3.76617
3.93499	3.43471
3.43403	4.04347
4.04807	2.20903
4.16083	2.31331
4.15212	2.31406
4.26655	2.37755
4.07067	2.31315
4.44199	1.56916
4.80559	1.62179
4.55396	1.52309
4.2432	1.53696
4.45275	1.71283
