# Supplementary material for: Spatiotemporal recruitment of RhoGTPase protein GRAF inhibits actomyosin ring constriction in Drosophila cellularization
Source: eLife. 2021 Apr 9;10:e63535. doi: 10.7554/eLife.63535 (PMC8081525; doi:10.7554/eLife.63535)
Supplement: Figure 2—source data 1. [file elife-63535-fig2-data1.xlsx]

## Sheet: Figure 2-source data 1
Figure 2-source data 2B					Figure 2-source data 2C				Figure 2-source data 2E
Early	Mid	Late			Control	GrafCR57			Early				Mid				Mid				Late
2.32797	6.84257	2.92349			4.98331	1.33222			Length(um)	GRAF-GFP	Sqh-mCherry		Length(um)	GRAF-GFP	Sqh-mCherry		Length(um)	GRAF-GFP	Sqh-mCherry		Length(um)	GRAF-GFP	Sqh-mCherry
2.57912	6.38182	3.0986			4.838	1.44328			0	0.163623	0.230843		0	0.0479219	0.0764991		0	0.0511278	0.037533		0	0.0991864	0.149723
2.61459	5.92664	2.78771			4.74212	1.47542			0.13872	0.142161	0.224319		0.13872	0.0484152	0.0884858		0.13872	0.0462547	0.0657911		0.13872	0.104492	0.148979
2.48536	5.95246	2.99526			5.02744	1.55918			0.27743	0.0793983	0.156816		0.27743	0.0592441	0.120081		0.27743	0.0654758	0.0833707		0.27743	0.0782405	0.156163
2.74308	6.40648	2.84547			4.94839	1.39128			0.41615	0.0865126	0.167304		0.41615	0.0508758	0.0954897		0.41615	0.0681521	0.116861		0.41615	0.0936007	0.150829
4.98331	5.60906	3.08196			5.07846	1.7028			0.55487	0.11245	0.207185		0.55487	0.0400884	0.0739342		0.55487	0.0446203	0.0681282		0.55487	0.101166	0.147939
4.838	5.91847	2.99786			4.88695	1.60964			0.69358	0.0870415	0.119368		0.69358	0.048962	0.0749557		0.69358	0.0441401	0.0527093		0.69358	0.0958663	0.12501
4.74212	5.79766	3.17408			4.94137	1.55342			0.8323	0.0789704	0.0974241		0.8323	0.0617641	0.0699067		0.8323	0.036164	0.0689513		0.8323	0.0832972	0.114275
5.02744	5.81898	2.84605			4.7005	1.59831			0.97102	0.0591431	0.118733		0.97102	0.0499367	0.0961512		0.97102	0.0717764	0.0658793		0.97102	0.102515	0.141594
4.94839	6.15082	3.11519			4.56294	1.58983			1.10973	0.0670062	0.0755429		1.10973	0.0319162	0.0760949		1.10973	0.0632054	0.0769106		1.10973	0.0784509	0.128709
5.07846	5.44012	3.16679			5.51168	1.22454			1.24845	0.0626794	0.0832538		1.24845	0.0408373	0.0718616		1.24845	0.0483855	0.0392013		1.24845	0.0858017	0.163252
4.88695	5.0108	2.94217			5.38127	1.30484			1.38717	0.0599098	0.0782952		1.38717	0.0402251	0.0817171		1.38717	0.0488817	0.0457495		1.38717	0.0794173	0.145541
4.94137	5.0624	2.78413			5.30678	1.13486			1.52588	0.0702216	0.0582367		1.52588	0.0734132	0.0618739		1.52588	0.0542237	0.0483071		1.52588	0.0919253	0.10764
4.7005	4.88151	2.96288			5.19604	1.19661			1.6646	0.0706793	0.0807205		1.6646	0.086673	0.0751542		1.6646	0.0699025	0.0567662		1.6646	0.0862047	0.140787
4.56294	4.99462	3.13512			5.44167	1.33675			1.80332	0.070186	0.117997		1.80332	0.0511789	0.0621459		1.80332	0.0475308	0.0601027		1.80332	0.105951	0.155313
5.40351	5.87523	2.21887			5.60906	1.11687			1.94203	0.0584061	0.0651245		1.94203	0.0730804	0.0834221		1.94203	0.0532787	0.0725672		1.94203	0.084868	0.125069
5.63737	5.70094	2.00754			5.91847	1.12094			2.08075	0.0442191	0.0899322		2.08075	0.0762067	0.0688484		2.08075	0.0709681	0.0504016		2.08075	0.0876894	0.145497
5.57002	5.56181	2.11221			5.79766	1.08188			2.21947	0.0566171	0.121049		2.21947	0.0560109	0.0860385		2.21947	0.0696029	0.0534516		2.21947	0.126096	0.163514
5.02323	5.92595	2.02001			5.81898	1.05712			2.35819	0.0718917	0.0898285		2.35819	0.094245	0.0453453		2.35819	0.0746947	0.0664158		2.35819	0.104159	0.128616
5.9203	5.81336	1.9708			6.15082	1.0889			2.4969	0.0621921	0.112223		2.4969	0.0712082	0.0730302		2.4969	0.0791528	0.0487848		2.4969	0.0936708	0.160849
5.51168	5.13712	1.56262			2.92349	0.890648			2.63562	0.0547271	0.123243		2.63562	0.0897042	0.0830694		2.63562	0.0855462	0.0944094		2.63562	0.0915603	0.13357
5.38127	5.02552	1.58577			3.0986	0.893894			2.77434	0.0513156	0.0902438		2.77434	0.0819361	0.086134		2.77434	0.0953968	0.1495		2.77434	0.0747838	0.128962
5.30678	5.27161	1.39225			2.78771	0.910775			2.91305	0.0612649	0.15997		2.91305	0.0731934	0.0907421		2.91305	0.1308	0.125357		2.91305	0.0797394	0.161477
5.19604	5.28178	1.47214			2.99526	0.9064			3.05177	0.0915169	0.160853		3.05177	0.0615204	0.0977019		3.05177	0.120311	0.105169		3.05177	0.106362	0.182354
5.44167	5.42776	1.53118			2.84547	0.927479			3.19049	0.105419	0.13721		3.19049	0.116301	0.161972		3.19049	0.148355	0.19117		3.19049	0.0756848	0.189518
					2.21887	0.830488			3.3292	0.111517	0.140073		3.3292	0.124331	0.164463		3.3292	0.207723	0.260357		3.3292	0.0761787	0.117546
					2.00754	0.784319			3.46792	0.0932465	0.127359		3.46792	0.180127	0.218356		3.46792	0.226822	0.23767		3.46792	0.101567	0.147507
					2.11221	0.814075			3.60664	0.131088	0.12899		3.60664	0.229821	0.261188		3.60664	0.209812	0.283199		3.60664	0.0857215	0.114674
					2.02001	0.797298			3.74535	0.167361	0.15549		3.74535	0.239277	0.275769		3.74535	0.364337	0.397165		3.74535	0.0941855	0.126139
					1.9708	0.788481			3.88407	0.162713	0.145621		3.88407	0.325236	0.357302		3.88407	0.488859	0.668391		3.88407	0.107855	0.143271
									4.02279	0.206659	0.129955		4.02279	0.444741	0.413995		4.02279	0.517285	0.775559		4.02279	0.0989516	0.178077
									4.1615	0.300767	0.164162		4.1615	0.657777	0.490986		4.1615	0.416501	0.679004		4.1615	0.100348	0.183151
									4.30022	0.344029	0.202317		4.30022	0.829453	0.621231		4.30022	0.290372	0.499893		4.30022	0.112199	0.189841
									4.43894	0.433294	0.267095		4.43894	0.989617	0.724092		4.43894	0.172839	0.329279		4.43894	0.097521	0.24382
									4.57765	0.560644	0.333121		4.57765	1	1		4.57765	0.236793	0.201364		4.57765	0.10213	0.245724
									4.71637	0.58292	0.363983		4.71637	0.76631	0.828291		4.71637	0.126158	0.128745		4.71637	0.114873	0.273029
									4.85509	0.6829	0.390967		4.85509	0.434304	0.505552		4.85509	0.079431	0.119507		4.85509	0.137755	0.385055
									4.9938	0.738768	0.379132		4.9938	0.292417	0.359198		4.9938	0.103765	0.118603		4.9938	0.139908	0.337117
									5.13252	0.681474	0.419543		5.13252	0.22884	0.216695		5.13252	0.0888454	0.0831723		5.13252	0.111726	0.299935
									5.27124	0.658722	0.430473		5.27124	0.125383	0.2418		5.27124	0.0606206	0.0853477		5.27124	0.104366	0.259948
									5.40995	0.583758	0.425776		5.40995	0.118078	0.139858		5.40995	0.0735173	0.0499974		5.40995	0.132094	0.16833
									5.54867	0.38243	0.42243		5.54867	0.123938	0.0956882		5.54867	0.0450482	0.0589489		5.54867	0.118163	0.166096
									5.68739	0.334799	0.304516		5.68739	0.105092	0.0970257		5.68739	0.039059	0.103545		5.68739	0.105132	0.196783
									5.8261	0.227705	0.316335		5.8261	0.0534909	0.0995392		5.8261	0.021514	0.0807102		5.8261	0.0791629	0.190547
									5.96482	0.211426	0.306313		5.96482	0.0597137	0.0846054		5.96482	0.049334	0.0306834		5.96482	0.0897404	0.128702
									6.10354	0.200817	0.169023		6.10354	0.0842184	0.0669891		6.10354	0.0566344	0.0419867		6.10354	0.129749	0.107711
									6.24225	0.164764	0.21697		6.24225	0.0622158	0.0679445		6.24225	0.0357557	0.0304041		6.24225	0.101717	0.16388
									6.38097	0.117496	0.228		6.38097	0.0600821	0.0935568		6.38097	0.036208	0.0544805		6.38097	0.077557	0.161462
									6.51969	0.149691	0.197434		6.51969	0.0567538	0.0675476		6.51969	0.028182	0.0517466		6.51969	0.0972506	0.126217
									6.6584	0.120265	0.159233		6.6584	0.0336695	0.077381		6.6584	0.0382062	0.0501444		6.6584	0.0953308	0.140943
									6.79712	0.103451	0.117117		6.79712	0.0284036	0.0659822		6.79712	0.0310039	0.0499386		6.79712	0.0949677	0.149533
									6.93584	0.110221	0.0941352		6.93584	0.0496514	0.0466682		6.93584	0.0473388	0.0437432		6.93584	0.108299	0.138602
									7.07455	0.0943817	0.129575		7.07455	0.0524151	0.0549215		7.07455	0.0415196	0.0659455		7.07455	0.0986806	0.131493
									7.21327	0.13129	0.111087		7.21327	0.035827	0.0684957		7.21327	0.0371494	0.0610361		7.21327	0.10812	0.130356
									7.35199	0.101627	0.0692262		7.35199	0.0358924	0.0480719		7.35199	0.0357729	0.0322194		7.35199	0.104798	0.129031
									7.49071	0.112384	0.0813901		7.49071	0.0396843	0.0475942		7.49071	0.0211889	0.0420969		7.49071	0.0753853	0.135917
									7.62942	0.0875824	0.0871152		7.62942	0.0332594	0.036313		7.62942	0.0191901	0.0285448		7.62942	0.0958931	0.148621
									7.76814	0.0891336	0.170292		7.76814	0.0263413	0.0142944		7.76814	0.0488384	0.0592282		7.76814	0.0788675	0.129244
									7.90686	0.0956892	0.132503		7.90686	0.0417526	0.0465726		7.90686	0.0570409	0.0508058		7.90686	0.110202	0.127109
									8.04557	0.0964619	0.105231		8.04557	0.0428818	0.0662394		8.04557	0.0287656	0.0432213		8.04557	0.136905	0.102006
									8.18429	0.0843789	0.113532		8.18429	0.0302164	0.0578318		8.18429	0.0234546	0.0425232		8.18429	0.102887	0.114501
									8.32301	0.0862095	0.17579		8.32301	0.0415505	0.0656809		8.32301	0.0241054	0.0409284		8.32301	0.122728	0.143392
									8.46172	0.0558029	0.129805		8.46172	0.0527836	0.042141						8.46172	0.0989563	0.184664
									8.60044	0.0743345	0.13269		8.60044	0.0399458	0.0398554						8.60044	0.0968137	0.158806
									8.73916	0.0690448	0.166315		8.73916	0.0362668	0.0325354						8.73916	0.0948702	0.117927
									8.87787	0.0611104	0.0848332		8.87787	0.0626259	0.0460288						8.87787	0.0847616	0.12953
									9.01659	0.0672024	0.0507353		9.01659	0.0442251	0.0888239						9.01659	0.0732379	0.111907
									9.15531	0.107427	0.0885035										9.15531	0.0989902	0.136519
									9.29402	0.112991	0.145097										9.29402	0.0941112	0.143301
									9.43274	0.117567	0.168712										9.43274	0.0921505	0.125698
									9.57146	0.126215	0.155093										9.57146	0.108398	0.149909
									9.71017	0.133222	0.126154
									9.84889
