# Supplementary material for: Spatiotemporal recruitment of RhoGTPase protein GRAF inhibits actomyosin ring constriction in Drosophila cellularization
Source: eLife. 2021 Apr 9;10:e63535. doi: 10.7554/eLife.63535 (PMC8081525; doi:10.7554/eLife.63535)
Supplement: Figure 3—source data 1. [file elife-63535-fig3-data1.xlsx]

## Sheet: Figure 3-source data
Figure 3-source data 3B												Figure 3-source data 3C			Figure 3-source data 3D			Figure 3-source data 3F												Figure 3-source data 3G			Figure 3-source data 3H
Time(sec)	Control early					GrafCR57 early						Control early	GrafCR57 early		Control_early	GrafCR57 early		Time(sec)	Control mid					GrafCR57 mid						Control mid	GrafCR57 mid		Control mid	GrafCR57 mid
0	0.734173	0.450941	0.160608	0.158192	0.32052	0.622234	0.385252	1.12473	1.58633	0.574326		3.96274	12.152		0.0829	0.1958		0	0.226002	0.0953884	0.452057	0.128977	0.0329555	0.549626	0.288007	0.516064	0.326468	0.386989		0.61299	7.23426		0.0134	0.1376
1	0.799011	0.551792	0.194813	0.285782	0.513473	1.07536	0.643505	1.4146	1.94175	1.0936		2.7789	10.4255		0.0533	0.1239		1	0.291	0.225723	0.51798	0.160479	0.126911	0.743531	0.543658	1.22026	0.521274	0.710854		1.33474	7.84747		0.03	0.1233
2.3	0.989417	0.646349	0.323465	0.322072	0.674419	1.588	0.707772	1.9304	2.29668	1.53948		2.33626	15.5423		0.0466	0.2028		2.3	0.323	0.325033	0.615993	0.192476	0.158122	1.06635	0.802582	1.63143	0.742608	0.93581		1.31175	8.72826		0.0129	0.1404
3.5	1.08834	0.742309	0.355381	0.248556	0.580893	1.91358	0.869186	2.22051	2.58989	1.69772		2.3249	12.3313		0.0441	0.172		3.5	0.323276	0.261147	0.683323	0.322945	0.192802	1.35729	1.02935	1.88831	0.935311	1.16334		1.87038	6.52164		0.0427	0.1278
4.8	1.25355	0.874489	0.457038	0.442918	0.61386	2.26777	0.9985	2.54243	2.90807	1.95301		3.06464	8.82784		0.0528	0.1624		4.8	0.484255	0.194417	0.717862	0.354171	0.257815	1.58314	1.15832	2.11943	1.12904	1.25943		1.67923	6.7981		0.0166	0.1018
6	1.37578	0.93991	0.415971	0.570235	0.709765	2.49766	1.15842	2.89894	3.19526	2.17881								6	0.549251	0.261207	0.645697	0.418176	0.288091	1.809	1.25526	2.34969	1.28982	1.39249
7.3	1.53652	1.03317	0.511805	0.602205	0.773703	2.78476	1.44973	3.15684	3.48677	2.47141								7.3	0.484255	0.270435	0.683323	0.451458	0.289757	2.00443	1.41717	2.51096	1.51719	1.55236
8.5	1.56946	1.06615	0.545697	0.670272	0.805387	3.01139	1.67549	3.12578	3.64959	2.76068								8.5	0.484266	0.331728	0.678626	0.54791	0.256772	2.16396	1.51311	2.63931	1.61405	1.64812
9.8	1.63336	1.1631	0.514761	0.744814	0.935555	3.20291	1.80407	3.38276	3.81024	2.94834								9.8	0.581697	0.465548	0.685982	0.644896	0.322776	2.35585	1.70701	2.89609	1.80678	1.74409
11	1.76216	1.25812	0.578631	0.727836	1.03124	3.49338	1.90495	3.64067	4.10272	3.01167								11	0.549701	0.475708	0.811849	0.838163	0.387738	2.51681	1.86793	3.01209	1.96927	1.87305
12.3	1.89098	1.22959	0.708517	0.852796	1.03455	3.68095	2.12896	3.8345	4.25649	3.2047								12.3	0.517321	0.539365	0.710559	0.676166	0.325298	2.74275	2.06032	3.173	2.09807	2.03491
13.5	2.0535	1.29506	0.866293	0.88474	1.1042	4.03421	2.19216	4.09334	4.491	3.55939								13.5	0.613676	0.60303	0.807361	0.741077	0.3879	2.80753	2.12431	3.30116	2.25723	2.19584
14.8	2.08034	1.32802	0.933021	0.923149	1.22668	4.292	2.3229	4.35224	4.68911	3.81717								14.8	0.580904	0.599962	0.708607	0.709165	0.360288	2.9357	2.34928	3.49394	2.42062	2.29508
16	2.21353	1.39294	0.998883	0.998834	1.32516	4.5498	2.48572	4.77309	4.84968	3.97822								16	0.677244	0.539468	0.80545	0.837163	0.421167	3.00244	2.44788	3.61772	2.58316	2.39201
17.2	2.31109	1.45404	1.06275	0.97106	1.38619	4.58056	2.64663	4.96697	4.97835	4.20464								17.2	0.519109	0.607473	0.707831	0.838163	0.425903	3.19634	2.60785	3.80739	2.71378	2.51974
18.5	2.43825	1.54997	1.02979	1.13916	1.32223	4.67866	2.74371	5.22482	5.13669	3.88313								18.5	0.422163	0.738196	0.768038	0.999161	0.522757	3.32337	2.76981	3.87206	2.84077	2.51974
19.7	2.46966	1.71209	1.02979	0.958469	1.39363	4.81024	2.90557	5.48067	5.26441	4.14049								19.7	0.519076	0.838174	0.867197	1.03142	0.432873	3.51731	2.89878	3.99944	2.9394	2.64981
21	2.50317	1.64691	1.19149	1.22322	1.54936	5.04248	3.09945	5.67557	5.45799	4.52902								21	0.581306	0.645481	0.871235	0.998424	0.492623	3.64627	3.09174	4.12882	3.13309	2.84267
22.2	2.60743	1.67699	1.19457	1.22222	1.58004	5.39693	3.16889	5.80672	5.67792	4.43204								22.2	0.581697	0.838174	0.839298	1.09682	0.492623	3.87221	3.18943	4.16606	3.22894	2.87565
23.5	2.60743	1.77396	1.19149	1.13091	1.64195	5.58964	3.29617	6.0934	5.87422	4.68999								23.5	0.742676	0.841906	0.835723	1.12816	0.425203	3.9032	3.31939	4.28907	3.42443	2.96951
24.7	2.80002	1.67992	1.26072	1.17088	1.74319	5.81894	3.42504	6.41628	5.97205	4.78697								24.7	0.741676	0.806384	0.870349	1.12741	0.460738	3.90297	3.54433	4.47917	3.52028	3.10039
26	2.86824	1.80784	1.29601	1.17088	1.67391	6.04356	3.62031	6.60834	6.19484	4.94931								26	0.678284	0.834613	0.96805	1.09616	0.526574	4.03248	3.77027	4.54192	3.61712	3.19868
27.2	2.8948	1.87281	1.35982	1.30741	1.67973	6.20716	3.74642	6.89853	6.35742	5.11027								27.2	0.646291	0.770002	1.03397	1.19241	0.530866	4.16213	3.93123	4.76703	3.77717	3.3289
28.4	2.92674	1.8383	1.38721	1.146	1.64677	6.374	3.84506	7.1572	6.64797	5.20752								28.4	0.710242	0.881738	1.09982	1.22481	0.593509	4.2581	4.0612	4.86465	3.74421	3.49075
29.7	2.98883	1.77496	1.41914	1.05147	1.55434	6.53681	4.13313	7.35014	6.707	5.36735								29.7	0.710276	0.785566	1.13175	1.16141	0.592511	4.41892	4.22116	4.98948	3.90668	3.65301
31	3.02178	1.77808	1.45423	1.32269	1.58628	6.79872	4.33614	7.58076	6.87363	5.56033								31	0.712041	0.878676	1.13175	1.29202	0.590448	4.51556	4.41512	5.11804	4.00354	3.71694
32.2	3.02358	1.93795	1.55228	1.12507	1.68128	6.86125	4.53468	7.74166	7.03895	5.75431								32.2	0.711276	0.845932	1.06689	1.3231	0.52108	4.61156	4.5111	5.3114	4.00729	3.81385
33.5	3.05552	1.97128	1.55472	1.25355	1.80713	7.15386	4.66784	8.00182	7.19695	5.6889								33.5	0.644989	0.970122	1.03496	1.32237	0.649919	4.74135	4.64178	5.18282	4.17099	4.00666
34.7	3.1177	2.00425	1.58662	1.0522	1.83676	7.38058	4.92748	8.19237	7.42525	5.75321								34.7	0.776019	0.946198	1.06147	1.35437	0.524626	4.90235	4.77074	5.30645	4.29873	4.16994
36	3.08574	2.03621	1.49262	1.14719	1.90173	7.54116	5.08806	8.38528	7.65276	5.75321								36	0.680023	1.04554	1.06147	1.29038	0.526574	4.99935	4.86756	5.55921	4.43272	4.36426
37.2	3.15432	2.09979	1.55472	1.21615	1.96409	7.83143	5.28527	8.64222	7.88241	5.84921								37.2	0.742676	0.978928	1.06147	1.35537	0.623384	5.16131	4.99843	5.71387	4.56616	4.65391
38.4	3.18835	2.0017	1.58761	1.19426	2.02811	8.06385	5.32066	8.99709	7.97518	6.01057								38.4	0.678284	1.04241	1.09343	1.54833	0.560582	5.32285	5.19355	5.87117	4.59806	4.78377
39.7	3.25321	2.03621	1.61952	1.29007	2.0601	8.11394	5.44834	9.41533	8.16526	6.14027								39.7	0.709242	1.07416	0.992932	1.3218	0.593509	5.1667	5.28948	6.09381	4.62997	4.98155
41	3.35001	2.09864	1.68086	1.4808	2.15686	8.28458	5.61497	9.54405	8.32504	6.14127								41	0.775262	1.13766	1.12499	1.45039	0.587661	5.26363	5.48335	6.22268	4.69379	5.0135
42.3	3.41388	2.16757	1.71378	1.4808	2.22111	8.39806	5.72005	9.96253	8.55006	6.20456								42.3	0.613258	1.11421	0.999991	1.51539	0.745255	5.39153	5.51655	6.35021	4.82342	5.17525
43.5	3.44581	2.2305	1.7852	1.64987	2.35048	8.52895	5.99937	10.3196	8.74609	6.36534								43.5	0.774672	1.0191	1.19189	1.4508	0.655322	5.55341	5.61448	6.44588	4.95206	5.335
44.7	3.47775	2.2315	1.84997	1.59178	2.38369	8.72173	6.32646	10.5454	8.9434	6.52634								44.7	0.709988	1.08251	1.0295	1.51633	0.720199	5.64725	5.80733	6.53957	5.01589	5.53048
46	3.48435	2.23003	1.78909	1.61811	2.48348	8.94989	6.50936	10.9021	9.16726	6.72054								46	0.805987	1.17041	1.15732	1.51704	0.651569	5.87742	5.77535	6.57064	5.08072	5.56343
47.2	3.613	2.29642	1.75341	1.58154	2.51926	9.10989	6.51443	11.2259	9.42489	6.78522								47.2	0.773988	1.15142	1.15993	1.58102	0.748431	5.90939	5.96821	6.60673	5.20938	5.59828
48.5	3.58109	2.29397	1.89069	1.65593	2.55282	9.30525	6.68154	11.4828	9.78109	6.81768								48.5	0.903231	1.18311	1.09989	1.61385	0.819022	6.03829	6.06514	6.76762	5.30514	5.66621
49.7	3.58109	2.29397	1.89069	1.68751	2.62324	9.34163	6.95113	11.7397	10.0093	6.91567								49.7	0.869986	1.28824	1.07164	1.54903	0.949855	6.10224	6.29098	6.86456	5.30514	5.82483
50.9	3.65084	2.29269	2.01908	1.85678	2.53348	9.598	7.18848	11.9985	10.202	7.07619								50.9	0.96799	1.3199	1.13644	1.58102	0.819022	6.19916	6.35616	6.99038	5.33806	5.88422
52.2	3.67549	2.38962	2.01908	1.81488	2.50995	9.72988	7.48946	12.1934	10.4276	7.23681								52.2	0.934991	1.25659	1.16834	1.80696	0.88289	6.29609	6.45309	7.15132	5.36998	5.88322
53.4	3.57872	2.45358	2.04608	1.80397	2.54485	9.95348	7.65341	12.4843	10.6251	7.43053								53.4	0.903242	1.3199	1.0743	1.54715	0.914824	6.45698	6.51704	7.24741	5.53059	6.11242
54.7	3.70974	2.38962	2.17361	1.9199	2.67538	10.2065	7.85001	12.8363	10.8177	7.5268								54.7	0.838664	1.2465	1.18009	1.58032	0.947757	6.39202	6.67891	7.4076	5.66159	6.24122
55.9	3.76813	2.52117	1.94846	1.88834	2.7433	10.3064	8.21072	13.0614	11.0763	7.39861								55.9	0.774672	1.23388	1.18009	1.61232	0.977668	6.48995	6.71089	7.56856	5.79126	6.30695
57.2	3.80007	2.4892	1.94563	1.9364	2.87841	10.4734	8.43897	13.4163	11.1421	7.46471								57.2	0.839248	1.27058	1.3472	1.70977	1.03974	6.61786	6.87177	7.73028	5.82449	6.40378
58.4	3.76713	2.58941	1.97851	2.0319	3.04955	10.6491	8.58015	13.7728	11.3047	7.68914								58.4	0.806904	1.24429	1.19111	1.77582	1.10464	6.61886	6.93698	7.85826	5.79499	6.53446
59.7	3.89504	2.62136	1.97851	2.02738	3.08131	10.8763	8.74914	14.1588	11.4375	7.88117								59.7	0.902904	1.30838	1.27895	1.74283	1.26375	6.78134	7.16416	7.95431	5.82789	6.56839
60.9	3.89504	2.62136	2.0423	2.0644	3.13489	11.1008	9.01514	14.4487	11.5982	7.5588								60.9	0.774672	1.37783	1.2864	1.87096	1.26222	6.91122	7.16516	8.14639	5.99348	6.63539
62.1	3.9308	2.75199	2.2054	2.22301	3.17762	11.357	9.27397	14.7386	11.6992	7.88428								62.1	0.677684	1.27584	1.4595	1.77315	1.26222	7.03911	7.26248	8.27539	6.06278	6.70025
63.4	3.99273	2.68711	2.31508	2.11653	3.04955	11.6461	9.47074	14.8034	11.764	8.17421								63.4	0.74224	1.29709	1.26736	1.77338	1.26222	7.03911	7.32742	8.30835	6.16225	6.76625
64.6	3.98912	2.68711	2.32194	2.18804	3.01778	11.7415	9.69396	15.0616	11.8557	8.30469								64.6	0.773993	1.30216	1.39959	1.83738	1.32448	7.20097	7.42332	8.43739	6.25886	6.6079
65.9	3.99273	2.71361	2.26763	2.19247	2.84661	11.9661	9.99138	15.221	11.9486	8.40919								65.9	0.644995	1.19615	1.07164	1.90108	1.32348	7.20538	7.55219	8.46969	6.3255	6.66825
67.1	4.06167	2.77637	2.27279	2.0965	2.97041	11.9909	10.3095	15.382	12.1395	8.50611								67.1	0.613258	1.33474	1.38258	1.80508	1.51734	7.17032	7.78356	8.56694	6.45496	6.76618
68.3	3.96274	2.7789	2.33626	2.3249	3.06464	12.152	10.4255	15.5423	12.3313	8.82784								68.3	0.61299	1.33474	1.31175	1.87038	1.67923	7.23426	7.84747	8.72826	6.52164	6.7981
