# Supplementary material for: Spatiotemporal recruitment of RhoGTPase protein GRAF inhibits actomyosin ring constriction in Drosophila cellularization
Source: eLife. 2021 Apr 9;10:e63535. doi: 10.7554/eLife.63535 (PMC8081525; doi:10.7554/eLife.63535)
Supplement: Figure 4—figure supplement 1—source data 1. [file elife-63535-fig4-figsupp1-data1.xlsx]

## Sheet: Figure 4-figure supplement 1
Figure 4-figure supplement 1B
Time (min)	GrafCR57;GRAF-GFP															GrafCR57;GRAFDRhoGAP-GFP
1	0.550595	0.553307	0.581307	0.523115	0.539072	0.504149	0.492187	0.502988	0.504121	0.467347	0.559315	0.528628	0.516175	0.509875	0.51345	0.674284	0.810827	0.823328	0.680908	0.783966	0.830964	0.722063	0.832961	0.76919	0.837508	0.714331	0.713984	0.678104	0.817365	0.73798
2	0.592765	0.587857	0.586708	0.561197	0.60509	0.558224	0.542079	0.573414	0.55083	0.481052	0.575657	0.51588	0.52164	0.506273	0.511563	0.949011	0.956982	0.859771	0.784114	0.81868	0.855714	0.794394	0.778105	0.87056	0.802657	0.726957	0.721029	0.653892	0.660959	0.735887
3	0.630812	0.643635	0.614211	0.603403	0.606731	0.626294	0.54834	0.568734	0.58627	0.59425	0.510699	0.571838	0.558123	0.554832	0.580199	0.895526	0.869737	0.866376	0.817942	0.841216	0.89098	0.794809	0.85439	0.777393	1	0.796484	0.568269	0.641959	0.637372	0.604117
4	0.649101	0.679175	0.626155	0.630549	0.605952	0.56836	0.645851	0.640172	0.593815	0.577022	0.591031	0.555254	0.563095	0.599588	0.566528	0.928274	0.758089	0.884725	0.888293	0.733115	0.871607	0.789729	0.783857	0.839623	0.899401	0.778316	0.69935	0.693085	0.623796	0.58888
5	0.695712	0.69095	0.678595	0.655667	0.638967	0.697866	0.645265	0.63514	0.609233	0.674628	0.529515	0.510955	0.538514	0.544171	0.555468	0.817854	0.884971	0.845363	0.868096	0.825795	0.972542	0.967304	0.8688	0.885623	0.852393	0.769467	0.598967	0.677213	0.615222	0.70143
6	0.65111	0.636887	0.677307	0.652411	0.630104	0.711447	0.726659	0.662376	0.678376	0.686786	0.509176	0.583593	0.508452	0.538033	0.541239	0.93021	0.730668	0.818876	0.794197	0.857226	0.916441	0.969182	0.93526	0.830332	0.856347	0.617117	0.628631	0.702699	0.638813	0.720961
7	0.616127	0.625435	0.618323	0.621042	0.637643	0.729273	0.726738	0.793646	0.798504	0.691153	0.510738	0.590625	0.559868	0.554923	0.590269	0.987135	0.83925	0.73344	0.994791	0.775829	0.924427	0.880503	0.907842	0.824738	0.787198	0.692792	0.618593	0.571505	0.561809	0.610639
8	0.682555	0.674957	0.780716	0.698758	0.683334	0.754398	0.803061	0.789619	0.736243	0.755906	0.594966	0.547126	0.555124	0.516705	0.578436	0.861963	0.846719	0.943154	0.815112	0.972019	0.854706	0.854488	0.872003	0.81604	0.845	0.664466	0.639466	0.572901	0.565158	0.569858
9	0.671589	0.791067	0.684611	0.713391	0.692221	0.844772	0.855724	0.779199	0.759569	0.731412	0.513851	0.611077	0.550486	0.587932	0.538212	0.820891	0.851594	0.727434	0.846759	0.733233	0.853737	0.839129	0.838338	0.797201	0.757388	0.604126	0.648252	0.513812	0.575223	0.693562
10	0.794757	0.720491	0.707861	0.695167	0.791395	0.76111	0.884149	0.802559	0.785515	0.77577	0.6664	0.576321	0.529261	0.619159	0.528163	0.830267	0.805972	0.783612	0.831525	0.748133	0.793583	0.80578	0.830292	0.812758	0.766027	0.610788	0.615492	0.635108	0.566266	0.687521
11	0.741251	0.725921	0.761045	0.724404	0.712917	0.895027	0.837993	0.845403	0.789379	0.827248	0.632902	0.498691	0.591665	0.547888	0.609839	0.799544	0.762403	0.735307	0.770266	0.698087	0.764208	0.820033	0.791666	0.73086	0.723941	0.580107	0.685234	0.540554	0.523265	0.647244
12	0.754437	0.715506	0.8112	0.716759	0.693445	0.834352	0.843588	0.844325	0.768683	0.83381	0.707831	0.617184	0.61646	0.590439	0.592952	0.75059	0.73972	0.727926	0.796016	0.709292	0.731453	0.739795	0.711448	0.765869	0.865321	0.614902	0.523184	0.54786	0.611486	0.60513
13	0.764214	0.731316	0.785513	0.785959	0.718552	0.929624	0.829923	0.831816	0.881167	0.809031	0.727352	0.639913	0.60806	0.638525	0.687198	0.747572	0.743582	0.686107	0.772163	0.781008	0.772847	0.837547	0.859687	0.744539	0.74786	0.571217	0.61307	0.579783	0.523783	0.526272
14	0.809256	0.787558	0.790106	0.720426	0.745885	0.912764	0.964354	0.872729	0.865206	0.869914	0.733935	0.694274	0.666474	0.641041	0.662739	0.627688	0.72256	0.675709	0.693851	0.644357	0.816455	0.708996	0.835867	0.857355	0.765216	0.527478	0.569524	0.554517	0.442944	0.47985
15	0.841263	0.772316	0.914768	0.801482	0.766335	0.872449	0.908732	0.969508	0.936063	0.886802	0.728425	0.773471	0.671596	0.593193	0.711042	0.687099	0.680564	0.726039	0.630361	0.62358	0.773381	0.791626	0.744954	0.796153	0.799435	0.524138	0.578334	0.541437	0.48928	0.503729
16	0.833911	0.819267	0.836776	0.79952	0.86241	0.929836	0.936085	0.876515	0.873912	0.88669	0.632289	0.841616	0.672581	0.719452	0.615457	0.682392	0.712437	0.615943	0.644052	0.686372	0.755807	0.860083	0.650009	0.732382	0.800581	0.534658	0.500695	0.517836	0.495181	0.525597
17	0.86077	0.763845	0.888929	0.913795	0.817052	0.943563	0.864558	0.851122	0.928373	0.956664	0.77223	0.780312	0.681218	0.682459	0.697149	0.655581	0.627423	0.618223	0.704505	0.63615	0.89185	0.791844	0.890466	0.811572	0.71894	0.48039	0.499764	0.481515	0.471091	0.496991
18	0.809976	0.875983	0.802525	0.825306	0.877125	1	0.89825	0.948801	0.902628	0.916444	0.709716	0.853788	0.735625	0.683801	0.696957	0.636926	0.622174	0.67277	0.630283	0.623314	0.859845	0.849448	0.727124	0.821595	0.691719	0.444979	0.485486	0.481772	0.494092	0.481916
19	0.893515	0.881196	0.862984	0.791137	0.832459	0.944372	0.849636	0.874951	0.983967	0.854221	0.890749	0.690512	0.679825	0.697836	0.680262	0.622656	0.631659	0.584719	0.654106	0.651924	0.782533	0.812225	0.77935	0.693083	0.759227	0.481308	0.472553	0.495037	0.426433	0.451947
20	0.920426	0.975754	0.854689	0.866885	0.839974	0.92452	0.948605	0.921292	0.930434	0.853021	0.796457	0.728873	0.754606	0.833224	0.795606	0.559441	0.568139	0.622459	0.60414	0.60242	0.791073	0.753573	0.810742	0.727143	0.773815	0.47087	0.432749	0.44172	0.422562	0.437885
21	0.901341	0.894417	0.848017	0.861432	0.888202	0.902639	0.877364	0.876587	0.868434	0.902824	0.718694	0.718066	0.810363	0.932478	0.777662	0.583943	0.603776	0.550802	0.591746	0.570026	0.708601	0.735723	0.667741	0.743274	0.688793	0.439464	0.376564	0.40607	0.349763	0.429364
22	1	0.823578	0.865327	0.885918	0.816789	0.905135	0.870349	0.968325	0.888896	0.864547	1	0.638135	0.681353	0.809008	0.643546	0.537455	0.523951	0.603294	0.586606	0.573063	0.6593	0.704825	0.651946	0.643762	0.804258	0.369519	0.365576	0.392471	0.333459	0.393664
23	0.841105	0.885865	0.950021	0.845703	0.808435	0.891766	0.869221	0.916064	0.803877	0.833235	0.754914	0.985691	0.763479	0.794732	0.769042	0.560227	0.584405	0.534831	0.539008	0.596827	0.77431	0.656631	0.563129	0.598138	0.662324	0.424813	0.380502	0.383734	0.390527	0.361736
24	0.849774	0.881817	0.836196	0.871906	0.976791	0.824992	0.91774	0.838573	0.833101	0.894514	0.742665	0.718167	0.919678	0.682278	0.676001	0.526094	0.53319	0.508324	0.513553	0.58126	0.564849	0.529998	0.510922	0.553245	0.565264	0.368758	0.361498	0.399957	0.366229	0.354381
25	0.898594	0.990212	0.942083	0.876627	0.819272	0.86849	0.862682	0.835301	0.817565	0.827237	0.716383	0.754769	0.896825	0.781178	0.728092	0.446279	0.506929	0.465375	0.482525	0.459498	0.543895	0.537075	0.499298	0.558286	0.504794	0.342124	0.379327	0.331465	0.33305	0.370806
26	0.858022	0.875666	0.967536	0.914088	0.905788	0.84437	0.829152	0.906286	0.820206	0.807462	0.660541	0.650764	0.718389	0.764769	0.799732	0.493838	0.41993	0.406288	0.456127	0.432293	0.512563	0.491984	0.444422	0.466207	0.466661	0.349475	0.341071	0.352792	0.357568	0.325375
27	0.712126	0.833577	0.761596	0.800088	0.865802	0.829638	0.81031	0.732104	0.727782	0.767957	0.69159	0.645105	0.743996	0.629583	0.627975	0.425158	0.399418	0.391172	0.381737	0.405581	0.430407	0.460276	0.417815	0.423765	0.44207	0.359009	0.357685	0.314482	0.329624	0.315387
28	0.804528	0.906391	0.814475	0.77569	0.853617	0.739135	0.820117	0.834352	0.84375	0.815532	0.565357	0.594984	0.684696	0.600199	0.75896	0.390406	0.394032	0.391261	0.382917	0.375899	0.399806	0.42758	0.414059	0.382964	0.445589	0.306875	0.318268	0.280776	0.324272	0.298961
29	0.795999	0.724474	0.829606	0.739049	0.769469	0.75972	0.736885	0.701954	0.765466	0.776563	0.604906	0.708746	0.629185	0.635009	0.65337	0.363958	0.375929	0.352174	0.37244	0.349491	0.466642	0.404155	0.390159	0.370214	0.409611	0.268389	0.256244	0.278085	0.26833	0.279277
30	0.747759	0.783949	0.68706	0.674173	0.619378	0.67144	0.688752	0.724738	0.65597	0.695654	0.558501	0.619203	0.532046	0.548255	0.565944	0.360263	0.376804	0.350257	0.303387	0.331358	0.385336	0.377231	0.38079	0.351711	0.371064	0.232919	0.221076	0.216899	0.22023	0.235921
31	0.708798	0.721698	0.561074	0.640882	0.662609	0.730306	0.676041	0.66566	0.690366	0.643735	0.545236	0.538214	0.49793	0.503665	0.536756	0.34783	0.321176	0.337844	0.319613	0.307888	0.39356	0.328444	0.316623	0.320932	0.330184	0.222539	0.200721	0.205632	0.236223	0.206114
32	0.614106	0.661484	0.562674	0.590282	0.538223	0.532854	0.598461	0.542738	0.531832	0.561363	0.499045	0.45394	0.435781	0.465713	0.490175	0.307298	0.288605	0.301146	0.269253	0.279337	0.262182	0.335402	0.271275	0.283116	0.283353	0.17212	0.175262	0.193267	0.190197	0.200726
33	0.555439	0.535095	0.466733	0.494025	0.476399	0.479287	0.507478	0.45959	0.46341	0.491461	0.368468	0.320806	0.356534	0.359981	0.37415	0.249941	0.247386	0.225626	0.210559	0.24601	0.306047	0.269733	0.236938	0.229486	0.249669	0.157387	0.152449	0.151198	0.143303	0.1667
34	0.473364	0.453266	0.470318	0.485642	0.435704	0.407375	0.417522	0.431723	0.421705	0.399261	0.331804	0.343065	0.362276	0.389928	0.343456	0.183365	0.204122	0.186569	0.211523	0.185232	0.212031	0.220709	0.196355	0.222409	0.325064	0.133377	0.125266	0.125563	0.120801	0.141394
35	0.410076	0.417902	0.409853	0.400761	0.36965	0.354858	0.351775	0.367697	0.354461	0.370986	0.304689	0.32994	0.333484	0.329118	0.31107	0.150784	0.171306	0.157517	0.154391	0.192534	0.305316	0.196414	0.234902	0.252357	0.219721	0.124204	0.115624	0.101477	0.0992352	0.112784
36	0.358257	0.363254	0.363072	0.359961	0.340168	0.306373	0.302732	0.284884	0.339942	0.30969	0.268498	0.270902	0.28029	0.259902	0.284594	0.171148	0.146352	0.151256	0.174647	0.165359	0.305019	0.267717	0.216301	0.253306	0.236187	0.10294	0.088054	0.0944639	0.102841	0.0916191
37	0.343735	0.319595	0.313526	0.330643	0.293621	0.242525	0.236773	0.233819	0.235634	0.224414	0.243783	0.251211	0.235474	0.259607	0.226692	0.130823	0.139099	0.136602	0.129093	0.138814	0.290766	0.271671	0.2061	0.203155	0.227054	0.0882161	0.0806404	0.0768549	0.0813471	0.0816937
38	0.259932	0.253635	0.278882	0.265122	0.255767	0.19404	0.193861	0.176427	0.184061	0.187383	0.213267	0.218522	0.225469	0.214345	0.207858	0.110095	0.107668	0.112798	0.122391	0.121939	0.237907	0.199597	0.227964	0.18908	0.18054	0.0735914	0.0652776	0.0641478	0.0652416	0.0760626
39	0.225974	0.229454	0.210767	0.205559	0.208019	0.155708	0.1564	0.168312	0.146739	0.154507	0.173539	0.185666	0.184655	0.179172	0.18009	0.102508	0.115265	0.0921394	0.102675	0.113083	0.228952	0.189614	0.256271	0.203906	0.180659	0.0579	0.0588317	0.0675372	0.0523364	0.0687436
40	0.188313	0.164115	0.181893	0.168631	0.152036	0.123954	0.129271	0.126104	0.129991	0.116761	0.165087	0.155946	0.151993	0.15477	0.145289	0.0993435	0.125329	0.0994418	0.100385	0.107589	0.195821	0.141222	0.16095	0.148378	0.154743	0.0506169	0.0489019	0.0384905	0.042204	0.0427757
41	0.147519	0.146447	0.132166	0.126776	0.139863	0.112964	0.119788	0.104179	0.113422	0.109457	0.126944	0.133646	0.128191	0.125029	0.134036	0.0970437	0.100955	0.097938	0.101702	0.102754	0.178208	0.151323	0.176192	0.196493	0.207306	0.0496266	0.0432033	0.0432078	0.0345653	0.0302396
