# Supplementary material for: Spatiotemporal recruitment of RhoGTPase protein GRAF inhibits actomyosin ring constriction in Drosophila cellularization
Source: eLife. 2021 Apr 9;10:e63535. doi: 10.7554/eLife.63535 (PMC8081525; doi:10.7554/eLife.63535)
Supplement: Figure 4—source data 1. [file elife-63535-fig4-data1.xlsx]

## Sheet: Figure 4-source data
Figure 4-source data 4B													Figure 4-source data 4D												Figure 4-source data 4G
Early				Mid				Late					Early				Mid				Late				Time(min)	Control															GrafCR57;GRAFDRhoGAP-GFP
Length(um)	AnillinRBD-GFP	Sqh-mCherry		Length(um)	AnillinRBD-GFP	Sqh-mCherry		Length(um)	AnillinRBD-GFP	Sqh-mCherry			Length(um)	AnillinRBD-GFP	Sqh-mCherry		Length(um)	AnillinRBD-GFP	Sqh-mCherry		Length(um)	AnillinRBD-GFP	Sqh-mCherry		1	35.803	33.359	35.341	38.903	29.432	32.069	34.258	33.759	32.722	34.642	27.043	30.442	24.719	25.218	26.793	29.786	38.516	32.324	34.574	32.863	31.778	35.418	35.476	34.07
0	0.0424699	0.0925329		0	0.0274478	0.059457		0	0.063034	0.147092			0	0.116826	0.322953		0	0.0599493	0.226986		0	0.0716352	0.132267		2	32.031	38.595	38.749	32.858	35.515	27.729	31.358	36.101	35.698	33.835	29.943	27.561	27.773	25.602	27.216	39.15	33.555	37.151	27.632	34.901	33.82	36.131	34.937	34.937
0.1388	0.0253619	0.0980753		0.1388	0.0112027	0.0566172		0.1388	0.0454412	0.135955			0.1387	0.102843	0.35568		0.1387	0.0538381	0.192028		0.1387	0.0510361	0.160389		3	33.34	31.299	28.701	35.726	33.725	32.549	36.985	37.618	32.875	38.329	26.409	29.636	28.253	30.903	28.752	33.459	32.632	38.439	36.516	38.958	32.837	33.839	37.517	33.03
0.2775	0.048225	0.0915109		0.2775	0.013994	0.034242		0.2775	0.0333576	0.120973			0.2774	0.099334	0.332145		0.2774	0.0417311	0.177128		0.2774	0.0406767	0.143953		4	36.285	32.839	33.224	34.225	37.902	40.038	35.333	32.453	35.852	36.121	27.427	28.118	30.653	28.08	28.368	30.382	31.613	31.17	39.535	29.055	37.19	32.548	37.344	32.202
0.4163	0.0308919	0.124278		0.4163	0.0399637	0.0643683		0.4163	0.041802	0.136508			0.4162	0.117066	0.272823		0.4162	0.0466547	0.155888		0.4162	0.0461384	0.12772		5	38.826	35.38	30.144	34.591	28.2	37.177	32.971	34.469	34.181	37.676	26.447	24.546	25.41	23.182	25.871	32.747	30.17	31.267	29.69	30.247	28.157	25.962	22.553	28.331
0.555	0.0419296	0.0940625		0.555	0.046004	0.0474325		0.555	0.0521644	0.136283			0.5549	0.124072	0.272663		0.5549	0.031653	0.0876585		0.5549	0.0474056	0.11803		6	36.978	33.34	33.455	32.454	39.807	39.231	35.583	31.435	39.251	30.763	23.163	29.405	25.813	25.18	28.157	26.44	20.787	21.729	20.825	20.248	31.277	31.817	28.215	24.036
0.6938	0.0360018	0.0894599		0.6938	0.0272002	0.0650131		0.6938	0.0430701	0.119483			0.6936	0.10766	0.301035		0.6936	0.040226	0.102596		0.6936	0.048752	0.140632		7	30.548	31.896	34.264	34.09	33.07	32.376	32.568	32.28	37.023	33.759	26.543	27.523	26.985	26.697	25.602	19.191	24.671	21.517	22.267	26.555	26.501	27.291	27.541	31.162
0.8325	0.0345236	0.10892		0.8325	0.007496	0.0811463		0.8325	0.0319942	0.137047			0.8323	0.0921589	0.305131		0.8323	0.0433476	0.104556		0.8323	0.0516183	0.173068		8	32.55	33.571	34.514	33.975	33.07	30.878	35.487	32.261	30.648	34.277	24.488	23.24	27.216	24.296	27.331	20.748	20.229	19.498	21.556	23.229	28.485	27.849	27.753	27.252
0.9713	0.0271102	0.0842056		0.9713	0.0152847	0.0514521		0.9713	0.0307696	0.131345			0.971	0.110715	0.254662		0.971	0.0560566	0.107295		0.971	0.0734067	0.132553		9	30.587	31.723	33.07	32.146	32.531	33.759	30.821	34.296	33.835	31.185	26.505	22.568	26.37	28.522	26.716	19.171	17.21	18.345	21.844	22.594	27.252	26.019	28.562	27.657
1.11	0.0228707	0.148752		1.11	0.0184211	0.0847818		1.11	0.0409564	0.12662			1.1097	0.0807942	0.252098		1.1097	0.0455372	0.103397		1.1097	0.0298905	0.213951		10	35.919	30.548	28.393	31.357	28.547	31.896	34.411	31.013	32.51	29.688	27.35	28.752	24.623	28.522	26.947	20.787	20.344	21.652	18.902	21.652	29.505	27.984	27.618	28.908
1.2488	0.0314097	0.0912502		1.2488	0.0240262	0.06609		1.2488	0.0381681	0.126356			1.2485	0.0761799	0.293026		1.2485	0.0737181	0.0795848		1.2485	0.0498575	0.220034		11	27.95	27.7	31.184	31.318	33.205	30.033	32.28	29.246	32.818	33.816	25.218	25.583	27.619	24.411	26.198	20.691	21.517	22.594	21.94	21.787	27.618	30.391	28.485	27.002
1.3875	0.0254294	0.08887		1.3875	0.0198318	0.102678		1.3875	0.0435751	0.151086			1.3872	0.0950372	0.250752		1.3872	0.0312035	0.0960255		1.3872	0.0526204	0.257045		12	32.3	32.685	30.048	28.527	29.393	32.03	31.377	27.902	30.84	35.333	25.007	27.888	26.87	26.889	26.428	22.729	20.46	20.844	17.864	20.171	26.886	25.885	24.825	27.04
1.5263	0.0433628	0.120306		1.5263	0.0292712	0.0833345		1.5263	0.0527992	0.19016			1.5259	0.0709223	0.214623		1.5259	0.0376693	0.11482		1.5259	0.0845644	0.236886		13	34.802	30.279	30.991	31.28	33.994	30.801	26.097	27.748	26.73	29.611	25.737	27.388	27.119	26.121	22.164	20.864	18.941	18.768	20.729	18.46	24.094	22.264	24.517	25.365
1.665	0.0355216	0.0831836		1.665	0.033203	0.0284938		1.665	0.0414194	0.158188			1.6646	0.0574298	0.283465		1.6646	0.0605183	0.0966467		1.6646	0.127784	0.353248		14	32.57	28.816	32.127	32.3	33.109	28.651	30.859	27.556	31.262	30.321	28.656	27.753	26.524	27.484	24.431	19.46	20.844	18.364	21.614	19.921	21.397	20.762	20.299	24.999
1.8038	0.0575294	0.13087		1.8038	0.0563664	0.114442		1.8038	0.041802	0.14821			1.8033	0.0802045	0.268557		1.8033	0.0676275	0.105898		1.8033	0.143542	0.349865		15	33.032	32.724	28.893	28.604	30.664	33.567	28.497	26.673	29.188	29.726	26.351	24.93	22.894	24.911	27.58	19.921	23.613	17.21	19.094	19.037	20.184	23.4	21.59	23.092
1.9425	0.0572968	0.0806456		1.9425	0.05879	0.0816676		1.9425	0.0452454	0.142569			1.942	0.0744521	0.311226		1.942	0.0699944	0.130036		1.942	0.126093	0.316279		16	32.916	29.894	29.663	31.877	28.181	30.34	27.038	28.228	27.594	27.883	27.427	25.16	24.258	27.388	23.778	19.075	19.941	16.902	18.556	20.229	22.033	19.953	22.688	17.333
2.0813	0.0380353	0.073505		2.0813	0.0247015	0.0666182		2.0813	0.0649031	0.143347			2.0808	0.0666873	0.276456		2.0808	0.0603575	0.101266		2.0808	0.120299	0.259431		17	31.992	30.741	27.565	26.506	31.184	29.15	26.788	27.191	30.725	25.905	27.696	24.584	26.466	24.354	24.239	18.768	21.075	18.441	20.825	19.171	19.105	21.282	21.744	22.36
2.22	0.0287459	0.0806936		2.22	0.0303742	0.0791297		2.22	0.0580411	0.14855			2.2195	0.0648564	0.258913		2.2195	0.0503371	0.13347		2.2195	0.161856	0.245985		18	30.375	31.703	30.029	28.854	33.032	27.614	26.654	29.38	26.826	25.021	23.97	23.182	22.03	24.68	25.141	19.441	17.998	16.191	24.075	19.018	21.59	20.338	19.722	21.128
2.3588	0.0387631	0.105079		2.3588	0.037495	0.0902556		2.3588	0.0526784	0.139419			2.3582	0.079153	0.249364		2.3582	0.0752562	0.151033		2.3582	0.101336	0.152969		19	30.702	27.95	30.317	28.258	29.393	22.755	26.769	26.404	26.269	27.364	25.199	22.779	21.012	25.103	24.68	16.633	21.498	19.21	20.633	15.806	20.608	19.818	18.316	17.622
2.4975	0.0610861	0.169104		2.4975	0.0446984	0.0849944		2.4975	0.049109	0.151812			2.4969	0.0476732	0.30472		2.4969	0.0355828	0.128119		2.4969	0.0684514	0.156567		20	27.411	30.799	30.298	30.202	30.606	26.193	24.196	26.481	25.693	25.847	27.773	26.198	26.582	25.237	22.011	13.922	12.672	13.153	10.961	14.806	16.987	17.834	17.025	18.643
2.6363	0.05356	0.131172		2.6363	0.0217527	0.154549		2.6363	0.0464895	0.14354			2.6356	0.0822333	0.288873		2.6356	0.101181	0.153597		2.6356	0.0424783	0.126078		21	30.606	30.414	28.45	28.065	29.855	24.522	24.618	25.674	29.803	26.423	25.66	23.874	24.277	27.427	22.721	12.614	16.287	16.326	18.056	13.73	17.988	18.219	18.335	15.465
2.775	0.0644026	0.137702		2.775	0.0424549	0.114147		2.775	0.0389327	0.119657			2.7743	0.0984928	0.268925		2.7743	0.0965547	0.213004		2.7743	0.081475	0.151565		22	30.144	29.49	28.219	27.911	27.95	29.534	23.984	25.521	23.677	24.215	22.875	25.525	24.757	24.623	24.392	17.729	14.768	18.229	19.248	16.46	16.852	18.277	18.239	15.735
2.9138	0.0608535	0.135308		2.9138	0.0497032	0.102047		2.9138	0.0391165	0.164534			2.9131	0.0831777	0.298074		2.9131	0.14128	0.303757		2.9131	0.0833595	0.130724		23	28.72	24.831	25.428	29.547	24.081	23.255	27.326	25.348	22.755	24.138	25.18	25.18	24.162	22.664	25.698	17.845	16.556	15.691	18.345	17.095	18.2	19.24	18.547	18.335
3.0525	0.0530573	0.247747		3.0525	0.042695	0.120581		3.0525	0.0602412	0.146517			3.0518	0.0716686	0.283176		3.0518	0.170664	0.339207		3.0518	0.126758	0.136475		24	28.604	26.622	28.893	28.046	26.583	21.699	23.005	24.791	26.077	24.599	22.856	24.219	24.008	22.606	23.221	17.345	16.575	18.325	17.383	12.922	18.893	17.372	18.932	16.659
3.1913	0.0470995	0.245071		3.1913	0.0622341	0.130465		3.1913	0.0620848	0.136283			3.1905	0.0945465	0.300005		3.1905	0.202907	0.476878		3.1905	0.0848696	0.146131		25	29.278	25.505	25.351	24.928	28.296	23.773	21.046	24.061	24.119	21.661	21.857	24.738	23.912	23.95	24.008	16.979	12.287	13.691	15.922	17.075	16.948	16.698	18.027	17.468
3.33	0.0531849	0.283189		3.33	0.0377952	0.0773325		3.33	0.0671684	0.161483			3.3292	0.133853	0.34172		3.3292	0.325416	0.587035		3.3292	0.102389	0.141477		26	26.352	29.066	25.678	25.582	25.601	21.469	23.101	23.965	22.275	23.639	26.678	24.431	24.219	23.797	24.834	14.441	14.114	14.653	15.826	9.076	17.16	15.465	16.486	16.159
3.4688	0.0584598	0.287826		3.4688	0.0361819	0.111231		3.4688	0.0527849	0.129136			3.4679	0.0901961	0.33142		3.4679	0.36817	0.759985		3.4679	0.116834	0.203854		27	29.066	26.891	28.181	26.333	25.794	23.485	22.583	24.388	30.552	21.296	24.603	25.122	22.971	24.104	24.066	16.172	11.653	13.826	9.826	8.903	14.888	15.562	12.133	16.274
3.6075	0.0613712	0.335622		3.6075	0.0520068	0.137613		3.6075	0.0743455	0.154692			3.6066	0.0925342	0.334988		3.6066	0.489215	1		3.6066	0.118569	0.207		28	27.565	28.739	27.18	28.258	24.716	23.351	20.701	22.41	22.41	19.856	24.968	23.278	24.181	23.97	26.774	12.999	12.21	12.557	16.422	14.518	10.631	11.286	10.419	14.175
3.7463	0.0710207	0.322452		3.7463	0.0917754	0.251259		3.7463	0.103458	0.18524			3.7454	0.131156	0.434789		3.7454	0.614338	0.947064		3.7454	0.145164	0.344752		29	28.854	28.008	25.621	24.466	25.082	20.873	22.775	21.987	23.389	22.832	24.392	25.16	26.294	25.948	26.159	13.364	13.326	15.576	12.614	15.441	8.493	8.262	10.458	13.925
3.885	0.0801	0.299514		3.885	0.0978082	0.26233		3.885	0.092408	0.212932			3.8841	0.137003	0.442031		3.8841	0.688274	0.725147		3.8841	0.114398	0.37473		30	23.561	26.487	24.119	27.103	25.486	22.871	21.488	22.755	20.24	22.006	22.856	26.102	25.084	23.451	22.529	15.633	13.595	13.806	13.172	12.057	8.782	9.687	9.129	11.652
4.0238	0.0706005	0.229933		4.0238	0.218945	0.408894		4.0238	0.102148	0.189814			4.0228	0.177926	0.413713		4.0228	0.637451	0.706434		4.0228	0.0969642	0.274887		31	27.584	26.487	25.794	23.426	24.1	21.315	20.317	21.834	21.968	19.203	25.89	25.641	21.569	24.757	25.276	11.211	13.48	9.865	9.999	9.326	7.53	10.631	8.089	7.319
4.1625	0.115231	0.199079		4.1625	0.31586	0.624477		4.1625	0.136614	0.236795			4.1615	0.202441	0.406859		4.1615	0.584648	0.618117		4.1615	0.0883726	0.20448		32	23.484	26.506	25.967	26.102	25.794	20.509	20.758	16.591	21.68	20.009	24.469	25.871	25.506	25.621	23.989	9.749	7.269	11.98	11.73	13.576	6.356	5.855	7.203	4.776
4.3013	0.118871	0.254496		4.3013	0.529117	0.81062		4.3013	0.148891	0.313892			4.3002	0.163993	0.530646		4.3002	0.633752	0.628858		4.3002	0.0722162	0.186952		33	26.294	23.08	26.737	24.1	27.103	14.652	19.184	21.43	22.026	21.45	27.773	26.505	22.433	25.583	23.835	12.98	9.768	9.922	12.403	10.634	3.833	7.627	5.662	4.218
4.44	0.120296	0.295646		4.44	0.87256	0.988517		4.44	0.187958	0.351652			4.4389	0.277739	0.48597		4.4389	0.564054	0.64571		4.4389	0.0698695	0.177319		34	20.192	20.558	26.121	22.368	25.89	21.104	20.739	20.336	17.609	19.049	24.565	26.274	25.295	24.968	21.838	13.268	9.98	10.48	9.865	10.345	3.987	3.717	3.813	5.527
4.5788	0.180347	0.310229		4.5788	0.668893	0.627461		4.5788	0.22344	0.355418			4.5777	0.382322	0.530397		4.5777	0.518472	0.619521		4.5777	0.0693149	0.140392		35	19.499	23.907	24.639	19.692	20.154	18.915	20.317	20.374	16.265	19.625	21.838	22.856	24.661	25.449	25.564	7.307	8.788	8.595	14.518	9.23	4.372	3.659	3.159	4.468
4.7175	0.212207	0.337255		4.7175	0.300635	0.427929		4.7175	0.23011	0.389031			4.7164	0.497268	0.583903		4.7164	0.453265	0.561269		4.7164	0.0371836	0.117332		36	23.253	17.748	22.984	19.981	20.231	20.24	19.721	20.144	17.724	15.535	22.644	24.796	23.451	24.968	23.739	6.192	7.096	5.519	7.134	6.999	2.581	2.6	2.446	2.33
4.8563	0.248411	0.440708		4.8563	0.164837	0.252047		4.8563	0.239191	0.363741			4.8551	0.701045	0.649514		4.8551	0.446201	0.605633		4.8551	0.0419979	0.0972449		37	17.998	23.58	17.478	20	18.729	18.147	18.147	14.997	18.78	19.606	24.661	22.164	24.488	25.218	25.026	4.865	4.269	5.788	6.884	6.23	2.35	2.33	1.656	3.12
4.995	0.43317	0.555383		4.995	0.116972	0.227217		4.995	0.184652	0.348945			4.9938	0.938756	0.677255		4.9938	0.367592	0.711771		4.9938	0.0456737	0.147699		38	18.498	17.055	22.271	18.229	18.113	13.903	14.671	18.339	18.972	18.108	23.048	23.125	21.934	25.237	23.95	5.596	5.192	6.211	4.577	5.596	2.061	1.329	2.484	1.714
5.1338	0.631225	0.587039		5.1338	0.103879	0.311813		5.1338	0.148418	0.25927			5.1325	1	0.705005		5.1325	0.370867	0.751819		5.1325	0.0467582	0.132124		39	16.612	20.135	15.784	21.675	17.382	16.783	17.206	14.517	14.306	15.285	25.564	25.372	24.911	22.913	24.661	4.557	3.711	4.846	5.615	3.404	1.406	1.079	1.56	1.502
5.2725	0.956112	0.693661		5.2725	0.0599455	0.210617		5.2725	0.117118	0.215441			5.2712	0.996507	0.785236		5.2712	0.370438	0.859246		5.2712	0.0265409	0.0975936		40	16.285	17.882	16.708	16.574	18.729	14.21	16.783	15.881	16.13	14.46	24.315	21.838	18.515	19.418	21.377	3.692	1.692	3.654	3.404	2.596	0.481	1.079	0.52	0.481
5.4113	0.999302	0.803232		5.4113	0.0445033	0.189154		5.4113	0.0839688	0.198186			5.41	0.88985	0.870931		5.41	0.420577	0.998102		5.41	0.0418379	0.107226		41	13.744	16.343	17.036	16.227	18.595	14.191	15.017	11.771	12.731	13.768	21.78	21.185	19.821	19.629	19.552	1.731	1.634	1.404	1.384	2.211	0.366	0.27	0.443	0.366
5.55	1	0.642901		5.55	0.0383129	0.184983		5.55	0.0922279	0.19246			5.5487	0.610519	0.870222		5.5487	0.314893	0.879331		5.5487	0.0346677	0.100748		42	15.014	11.992	14.456	17.536	13.994	11.061	10.35	13.615	9.179	11.963	17.689	18.4	16.133	19.533	18.15	1.654	0.461	1.308	0.711	0.808	0.25	0.096	0.019	0.039
5.6888	0.780485	0.42002		5.6888	0.042875	0.15081		5.6888	0.0686796	0.159207			5.6874	0.494654	0.840576		5.6874	0.177708	0.566211		5.6874	0.0221385	0.150807		43	12.088	13.474	13.879	13.648	16.959	8.776	6.414	7.681	7.259	5.07	16.594	16.364	13.79	12.772	13.368	0.308	0.115	0.135	0.077	0.173	0.077	0.077	0.135	0.039
5.8275	0.496154	0.38372		5.8275	0.0558786	0.131912		5.8275	0.0669613	0.17963			5.8261	0.357296	0.671303		5.8261	0.145238	0.42254		5.8261	0.0497569	0.121367		44	15.245	12.512	15.149	16.477	15.958	7.412	6.471	5.722	5.665	4.916	15.961	14.213	11.255	12.542	11.293	0.077	0.154	0.077	0.058	0.019	0.039	0.039	0.058	0.077
7.4925	0.0691823	0.15959		7.4925	0.0268476	0.076969		7.4925	0.0297094	0.122308			7.4907	0.0564318	0.325272		7.4907	0.0311705	0.0966975
7.6313	0.0730016	0.212819		7.6313	0.0273503	0.0593884		7.6313	0.0555357	0.159888			7.6294	0.0626832	0.294839		7.6294	0.0387167	0.0802938
7.77	0.0413593	0.234529		7.77	0.0183536	0.0795138		7.77	0.0490332	0.129803			7.7681	0.0484279	0.324078		7.7681	0.0644482	0.0833976
7.9088	0.0559236	0.200259		7.9088	0.0261122	0.0485643		7.9088	0.0321105	0.154693			7.9069	0.0729841	0.274645		7.9069	0.0205109	0.097619
8.0475	0.0752527	0.2264		8.0475	0.0614912	0.0164076		8.0475	0.059785	0.160408			8.0456	0.0658667	0.312275		8.0456	0.0225439	0.0786541
8.1863	0.059833	0.189367		8.1863	0.0393484	0.0340705		8.1863	0.0566815	0.165213			8.1843	0.0703821	0.268918		8.1843	0.0372281	0.0924367
8.325	0.0322876	0.160413		8.325	0.0264724	0.0529543		8.325	0.0500341	0.157779			8.323	0.0797963	0.256329		8.323	0.0591575	0.0523637
8.4638	0.0522319	0.104715		8.4638	0.0176558	0.0594021		8.4638	0.0458562	0.159282			8.4617	0.075516	0.235644		8.4617	0.0468485	0.0879287
8.6025	0.036392	0.111273		8.6025	0.0329104	0.137544		8.6025	0.0425209	0.139933			8.6004	0.0500443	0.19743		8.6004	0.0503536	0.0895961
8.7413	0.0482701	0.14937		8.7413	0.0398661	0.0857627		8.7413	0.0460175	0.153836			8.7392	0.0659409	0.217399		8.7392	0.0747407	0.136722
8.88	0.0464467	0.12471		8.88	0.0122007	0.0952012		8.88	0.0421382	0.154083			8.8779	0.0994041	0.275451		8.8779	0.0611245	0.151962
9.0188	0.0434303	0.0837872		9.0188	0.0546105	0.095064		9.0188	0.070677	0.129809			9.0166	0.113115	0.248932		9.0166	0.0599287	0.160163
9.1575	0.0338934	0.108385						9.1575	0.0683802	0.123192			9.1553	0.0833962	0.233075		9.1553	0.0715903	0.183719
9.2963	0.0633821	0.054971						9.2963	0.0570379	0.135551			9.294	0.0853096	0.182425		9.294	0.0940146	0.244914
9.4351	0.0241988	0.0764957						9.4351	0.0804744	0.161836			9.4327	0.0778005	0.260103
9.5738	0.0175282	0.0876902						9.5738	0.0854575	0.187035			9.5715	0.112695	0.25847
9.7126	0.0556835	0.0824976											9.7102	0.12582	0.265576
9.8513	0.0316198	0.0952629											9.8489	0.117189	0.304787
9.9901	0.0529147	0.0938225											9.9876	0.112946	0.342978
[truncated: 36 more columns]
