# Supplementary material for: Spatiotemporal recruitment of RhoGTPase protein GRAF inhibits actomyosin ring constriction in Drosophila cellularization
Source: eLife. 2021 Apr 9;10:e63535. doi: 10.7554/eLife.63535 (PMC8081525; doi:10.7554/eLife.63535)
Supplement: Figure 5—source data 1. [file elife-63535-fig5-data1.xlsx]

## Sheet: Figure 5-source data
Figure 5-source data 5C				Figure 5-source data 5E
Control	GRAF-OE			Time(min)	Control															GRAF-OE
6.69131	5.27979			1	27.729	31.358	36.101	35.698	33.835	32.031	38.595	38.749	32.858	35.515	29.943	27.561	27.773	25.602	27.216	25.456	25.937	22.086	25.456	29.172	40.625	33.431	36.874	34.201	36.009	22.6	20.584	19.144	20.2	23.887
6.43358	5.14943			2	32.549	36.985	37.618	32.875	38.329	33.34	31.299	28.701	35.726	33.725	26.409	29.636	28.253	30.903	28.752	21.123	28.787	27.708	23.049	26.726	37.913	35.605	33.797	35.086	32.643	21.928	22.024	19.086	18.894	22.6
7.39369	4.83255			3	40.038	35.333	32.453	35.852	36.121	36.285	32.839	33.224	34.225	37.902	27.427	28.118	30.653	28.08	28.368	27.535	26.168	27.266	25.937	23.8	33.297	37.509	34.739	34.047	32.874	25.384	24.866	23.963	24.904	19.048
6.86132	5.60053			4	37.177	32.971	34.469	34.181	37.676	38.826	35.38	30.144	34.591	28.2	26.447	24.546	25.41	23.182	25.871	30.269	26.091	25.244	26.284	25.34	34.297	37.99	35.99	33.874	36.22	33.948	30.895	30.338	30.185	29.071
7.26859	5.41067			5	39.231	35.583	31.435	39.251	30.763	36.978	33.34	33.455	32.454	39.807	23.163	29.405	25.813	25.18	28.157	35.488	32.753	28.902	34.64	32.195	35.586	33.201	33.143	37.413	33.681	32.258	31.049	32.201	31.817	37.577
6.98335	9.96241			6	32.376	32.568	32.28	37.023	33.759	30.548	31.896	34.264	34.09	33.07	26.543	27.523	26.985	26.697	25.602	35.237	33.909	32.234	34.275	34.044	40.183	40.952	37.182	43.626	40.645	34.467	30.588	32.047	30.434	31.682
8.43861	9.81381			7	30.878	35.487	32.261	30.648	34.277	32.55	33.571	34.514	33.975	33.07	24.488	23.24	27.216	24.296	27.331	32.522	37.452	31.174	35.545	30.982	37.836	37.644	42.799	42.722	39.24	32.047	34.121	36.56	37.232	32.162
7.48179	11.0541			8	33.759	30.821	34.296	33.835	31.185	30.587	31.723	33.07	32.146	32.531	26.505	22.568	26.37	28.522	26.716	37.818	35.622	29.634	35.565	34.602	42.645	40.106	40.568	44.473	40.741	33.468	35.369	33.199	32.316	33.314
8.42506	8.88515			9	31.896	34.411	31.013	32.51	29.688	35.919	30.548	28.393	31.357	28.547	27.35	28.752	24.623	28.522	26.947	35.199	36.373	34.275	33.389	40.09	43.549	41.01	39.856	37.432	35.97	34.755	35.062	34.14	32.489	37.385
7.3212	11.3667			10	30.033	32.28	29.246	32.818	33.816	27.95	27.7	31.184	31.318	33.205	25.218	25.583	27.619	24.411	26.198	40.186	31.598	44.961	36.624	40.956	35.682	39.664	41.587	39.337	42.03	32.297	35.273	33.987	33.007	41.61
4.78445	3.56029			11	32.03	31.377	27.902	30.84	35.333	32.3	32.685	30.048	28.527	29.393	25.007	27.888	26.87	26.889	26.428	47.773	43.325	40.244	39.454	35.103	37.336	39.587	38.125	40.337	41.703	33.852	31.932	35.35	35.062	36.156
4.36357	3.60049			12	30.801	26.097	27.748	26.73	29.611	34.802	30.279	30.991	31.28	33.994	25.737	27.388	27.119	26.121	22.164	43.171	40.475	39.3	43.459	41.033	39.567	37.125	40.145	40.241	36.951	35.215	38.096	32.585	32.508	33.026
4.0706	3.57118			13	28.651	30.859	27.556	31.262	30.321	32.57	28.816	32.127	32.3	33.109	28.656	27.753	26.524	27.484	24.431	45.847	38.53	41.938	41.534	42.535	39.952	39.067	39.779	37.759	42.549	33.046	35.676	38.096	36.732	38.441
4.08902	3.22696			14	33.567	28.497	26.673	29.188	29.726	33.032	32.724	28.893	28.604	30.664	26.351	24.93	22.894	24.911	27.58	41.688	42.651	43.941	43.19	42.015	42.472	37.721	39.875	42.684	42.472	35.311	34.025	35.407	34.255	32.892
4.27353	3.45287			15	30.34	27.038	28.228	27.594	27.883	32.916	29.894	29.663	31.877	28.181	27.427	25.16	24.258	27.388	23.778	40.725	39.724	41.149	43.44	44.172	42.126	42.587	37.817	39.664	42.895	36.003	32.566	33.026	33.122	37.308
1.92864	7.51015			16	29.15	26.788	27.191	30.725	25.905	31.992	30.741	27.565	26.506	31.184	27.696	24.584	26.466	24.354	24.239	38.915	40.667	41.245	44.364	36.123	42.799	39.125	39.51	40.337	42.376	35.676	35.523	35.542	31.894	34.102
1.86514	6.62155			17	27.614	26.654	29.38	26.826	25.021	30.375	31.703	30.029	28.854	33.032	23.97	23.182	22.03	24.68	25.141	41.284	39.859	43.498	38.068	40.167	38.933	43.145	38.663	43.53	35.874	33.161	32.93	35.503	31.97	34.447
1.87982	6.52104			18	22.755	26.769	26.404	26.269	27.364	30.702	27.95	30.317	28.258	29.393	25.199	22.779	21.012	25.103	24.68	40.59	36.72	40.937	43.151	43.363	39.414	43.761	39.183	40.241	40.702	31.874	32.911	35.58	32.93	32.489
1.67054	6.93662			19	26.193	24.196	26.481	25.693	25.847	27.411	30.799	30.298	30.202	30.606	27.773	26.198	26.582	25.237	22.011	42.862	40.051	39.358	42.747	42.458	43.241	37.913	39.452	36.855	38.663	34.639	36.464	33.891	36.982	34.908
2.02014	6.8612			20	24.522	24.618	25.674	29.803	26.423	30.606	30.414	28.45	28.065	29.855	25.66	23.874	24.277	27.427	22.721	41.977	42.112	37.798	36.489	38.607	38.163	38.913	38.259	38.894	42.049	35.407	34.505	33.372	31.51	33.218
3.66522	11.1421			21	29.534	23.984	25.521	23.677	24.215	30.144	29.49	28.219	27.911	27.95	22.875	25.525	24.757	24.623	24.392	41.476	40.879	41.707	35.815	39.82	39.394	37.432	38.798	41.645	41.799	33.833	33.43	32.546	34.486	37.097
3.62681	9.72334			22	23.255	27.326	25.348	22.755	24.138	28.72	24.831	25.428	29.547	24.081	25.18	25.18	24.162	22.664	25.698	37.509	42.092	41.957	35.719	38.588	37.067	39.106	38.144	38.24	39.452	32.546	37.75	36.944	33.161	34.505
3.43732	11.3227			23	21.699	23.005	24.791	26.077	24.599	28.604	26.622	28.893	28.046	26.583	22.856	24.219	24.008	22.606	23.221	37.895	39.859	40.224	40.687	37.779	39.721	38.144	38.259	38.856	38.625	34.908	35.945	36.233	34.083	33.526
3.39284	10.8551			24	23.773	21.046	24.061	24.119	21.661	29.278	25.505	25.351	24.928	28.296	21.857	24.738	23.912	23.95	24.008	38.915	38.761	41.052	39.165	37.933	39.144	39.356	38.336	39.933	37.24	35.177	33.353	35.446	36.368	33.103
3.56586	10.9217			25	21.469	23.101	23.965	22.275	23.639	26.352	29.066	25.678	25.582	25.601	26.678	24.431	24.219	23.797	24.834	38.087	41.399	36.855	35.006	37.529	37.817	41.876	38.048	37.375	35.239	34.083	33.161	33.718	29.359	36.137
				26	23.485	22.583	24.388	30.552	21.296	29.066	26.891	28.181	26.333	25.794	24.603	25.122	22.971	24.104	24.066	38.549	37.914	39.493	40.494	38.183	40.529	36.24	41.01	40.548	37.836	35.292	32.642	31.145	31.337	35.081
				27	23.351	20.701	22.41	22.41	19.856	27.565	28.739	27.18	28.258	24.716	24.968	23.278	24.181	23.97	26.774	40.128	39.531	41.611	38.646	37.625	40.337	36.855	37.375	37.894	41.299	33.353	29.916	36.502	37.827	35.83
				28	20.873	22.775	21.987	23.389	22.832	28.854	28.008	25.621	24.466	25.082	24.392	25.16	26.294	25.948	26.159	37.394	40.321	40.975	36.412	36.085	39.221	36.432	40.837	37.894	37.99	36.521	30.434	35.407	36.041	33.967
				29	22.871	21.488	22.755	20.24	22.006	23.561	26.487	24.119	27.103	25.486	22.856	26.102	25.084	23.451	22.529	41.207	38.973	39.165	40.205	37.355	39.51	36.951	38.317	39.587	39.567	29.532	36.944	35.945	32.508	32.412
				30	21.315	20.317	21.834	21.968	19.203	27.584	26.487	25.794	23.426	24.1	25.89	25.641	21.569	24.757	25.276	37.028	38.819	36.893	37.567	36.72	38.183	36.721	37.99	37.125	40.125	36.156	32.393	31.721	40.054	37.673
				31	20.509	20.758	16.591	21.68	20.009	23.484	26.506	25.967	26.102	25.794	24.469	25.871	25.506	25.621	23.989	39.608	35.565	37.702	41.63	40.302	35.913	37.182	39.606	36.778	38.798	36.406	30.511	29.877	37.059	33.161
				32	14.652	19.184	21.43	22.026	21.45	26.294	23.08	26.737	24.1	27.103	27.773	26.505	22.433	25.583	23.835	37.452	36.643	37.529	39.916	37.933	35.836	38.202	41.279	39.394	37.221	31.145	35.849	28.437	34.697	32.143
				33	21.104	20.739	20.336	17.609	19.049	20.192	20.558	26.121	22.368	25.89	24.565	26.274	25.295	24.968	21.838	39.262	36.643	36.296	36.489	35.988	36.413	35.893	39.51	36.624	39.125	28.917	25.98	32.508	31.49	34.639
				34	18.915	20.317	20.374	16.265	19.625	19.499	23.907	24.639	19.692	20.154	21.838	22.856	24.661	25.449	25.564	38.299	37.683	38.549	37.009	37.818	36.471	35.855	36.798	34.855	37.971	35.254	38.499	30.684	28.457	28.725
				35	20.24	19.721	20.144	17.724	15.535	23.253	17.748	22.984	19.981	20.231	22.644	24.796	23.451	24.968	23.739	34.987	37.818	37.856	36.065	33.928	35.547	36.278	34.528	34.297	34.682	25.73	34.14	27.228	32.815	28.917
				36	18.147	18.147	14.997	18.78	19.606	17.998	23.58	17.478	20	18.729	24.661	22.164	24.488	25.218	25.026	33.254	34.891	35.834	32.137	35.083	36.817	34.162	35.278	34.258	33.72	31.682	27.228	28.053	31.721	30.415
				37	13.903	14.671	18.339	18.972	18.108	18.498	17.055	22.271	18.229	18.113	23.048	23.125	21.934	25.237	23.95	31.483	34.929	34.198	31.463	37.009	33.258	32.893	34.585	35.009	34.335	28.322	27.9	25.749	26.632	34.447
				38	16.783	17.206	14.517	14.306	15.285	16.612	20.135	15.784	21.675	17.382	25.564	25.372	24.911	22.913	24.661	34.679	35.16	30.635	32.445	35.141	35.182	33.124	33.816	32.662	34.585	25.288	24.501	24.943	27.266	25.192
				39	14.21	16.783	15.881	16.13	14.46	16.285	17.882	16.708	16.574	18.729	24.315	21.838	18.515	19.418	21.377	33.004	29.326	31.194	30.346	35.892	33.604	31.777	33.316	32.104	33.681	34.198	26.901	22.562	24.021	24.251
				40	14.191	15.017	11.771	12.731	13.768	13.744	16.343	17.036	16.227	18.595	21.78	21.185	19.821	19.629	19.552	24.666	31.117	28.286	30.058	31.444	30.738	34.047	32.316	30.988	31.2	25.845	22.216	22.619	29.301	23.368
				41	11.061	10.35	13.615	9.179	11.963	15.014	11.992	14.456	17.536	13.994	17.689	18.4	16.133	19.533	18.15	26.226	26.284	26.553	27.343	23.954	30.142	32.162	30.854	28.084	31.258	23.599	23.695	23.675	26.421	21.678
				42	8.776	6.414	7.681	7.259	5.07	12.088	13.474	13.879	13.648	16.959	16.594	16.364	13.79	12.772	13.368	25.109	25.109	26.63	23.338	22.548	28.257	32.874	29.411	27.699	27.622	21.947	30.453	22.331	23.003	30.242
				43	7.412	6.471	5.722	5.665	4.916	15.245	12.512	15.149	16.477	15.958	15.961	14.213	11.255	12.542	11.293	26.072	18.562	19.698	19.583	17.137	26.93	26.91	26.603	27.661	23.217	24.597	22.6	20.834	25	23.407
