# Supplementary material for: Spatiotemporal recruitment of RhoGTPase protein GRAF inhibits actomyosin ring constriction in Drosophila cellularization
Source: eLife. 2021 Apr 9;10:e63535. doi: 10.7554/eLife.63535 (PMC8081525; doi:10.7554/eLife.63535)
Supplement: Figure 6—figure supplement 1—source data 1. [file elife-63535-fig6-figsupp1-data1.xlsx]

## Sheet: Figure 6-figure supplement 1
Figure 6-figure supplement 1A																																															Figure 6-figure supplement 1B
Time(min)	Control															GrafCR57															GRAF-OE																Time(min)	Control
0	5.974	5.871	5.968	5.702	6.382	5.274	5.545	5.266	5.684	5.407	5.266	5.135	5.266	5.129	5.55	6.392	5.707	5.971	5.555	6.538											6.659	6.381	6.524	6.255	6.247												1	0.615908	0.617666
3	6.808	6.382	6.662	6.675	6.528	5.821	6.099	6.381	6.381	6.527	7.904	7.495	7.76	7.627	7.504	6.664	5.833	5.976	6.115	6.11	7.775	7.91	7.636	7.215	7.077						5.965	6.94	6.947	6.38	7.075												2	0.596421	0.598829
5	8.881	7.391	7.366	8.052	8.067	7.241	6.652	6.654	7.069	6.527	7.9	7.488	7.633	7.761	7.377	6.665	6.808	6.808	5.699	5.976	7.775	7.636	7.359	7.497	7.775	8.466	8.882	8.189	8.466	8.327	9.032	8.748	8.609	8.193	8.184	6.93	6.103	6.514	6.38	5.973	5.696	5.412	5.973	4.859	5.968		3	0.675003	0.623295
7	8.898	9.157	8.743	8.907	9.166	7.489	7.899	7.212	8.32	7.904	7.495	7.495	7.346	7.623	7.346	7.082	6.4	5.838	6.67	6.531	8.052	7.355	8.606	8.468	8.606	9.854	9.854	8.882	9.163	9.298	9.154	8.599	8.465	7.91	8.742	5.96	6.934	7.356	7.494	7.365	6.112	5.968	5.28	5.835	6.799		4	0.694295	0.679831
9	9.439	9.444	9.33	9.035	9.737	8.039	8.038	8.038	7.346	7.624	7.904	8.181	8.039	8.181	8.181	7.093	6.803	6.531	7.082	7.086	8.468	9.023	7.771	8.048	9.713	8.891	10.13	9.436	9.024	9.853	9.297	8.881	8.903	7.91	8.322	8.177	8.186	8.596	8.457	8.463	7.356	7.078	7.354	7.354	6.385		5	0.68565	0.688264
11	9.86	10.269	9.991	10.42	10.548	7.762	7.899	7.901	8.32	8.458	8.74	8.177	8.453	8.458	8.602	7.637	7.359	7.363	7.082	7.786	8.881	9.157	9.439	8.889	9.019	9.437	9.437	9.715	9.437	9.576	9.302	9.586	8.34	8.617	8.34	8.457	8.592	8.315	8.463	9.288	8.469	8.885	7.771	7.771	7.221		6	0.7251	0.716208
13	9.852	9.998	10.983	10.274	10.276	8.32	8.455	8.741	8.61	7.772	8.602	8.593	7.91	8.596	8.453	7.363	7.775	8.196	7.221	7.358	9.166	9.582	9.855	9.023	9.866	9.853	9.715	9.854	9.575	9.299	9.293	9.293	8.47	8.876	9.293	8.878	9.017	8.457	8.878	9.565	8.891	8.604	7.643	8.327	7.632		7	0.726222	0.774814
15	10.707	9.853	10.57	9.728	10.553	8.874	8.594	8.887	9.705	8.602	9.571	10.131	9.854	9.301	9.978	7.924	7.786	8.057	8.609	8.479	9.158	9.158	8.187	9.852	9.3	9.714	9.575	9.437	10.131	9.723	9.44	9.851	9.158	10.406	9.856	9.978	9.565	9.57	9.432	9.709	8.33	8.475	7.91	8.898	8.891		8	0.788352	0.71488
17	10.134	9.989	9.593	10.685	9.86	9.287	9.567	9.433	9.286	9.702	11.089	10.951	10.546	10.671	10.809	9.306	8.751	8.886	9.028	8.202	10.137	9.851	9.852	9.161	9.157	10.139	9.576	10.13	10.408	9.854	10.965	10.683	10.544	10.14	10.133	10.678	9.981	10.394	10.394	11.089	8.621	8.336	8.465	8.344	8.891		9	0.774268	0.770067
19	11.525	11.245	10.962	10.836	11.949	9.848	9.759	9.848	9.433	9.428	11.094	11.371	11.094	11.232	11.64	9.727	9.172	9.727	8.89	8.618	10.129	10.825	9.859	9.852	10.548	10.27	10.423	9.995	10.131	10.548	10.958	10.544	10.687	10.267	10.128	11.502	12.333	10.116	10.532	11.502	10.688	10.686	10.966	10.411	9.991		10	0.772581	0.753796
21	12.083	11.38	11.66	11.672	10.844	9.987	9.844	10.121	9.982	10.536	11.225	11.648	11.363	10.947	11.228	9.588	8.886	9.727	9.583	9.311	10.706	10.271	10.407	10.271	10.548	10.569	10.7	10.971	10.134	10.966	12.347	11.663	10.822	11.103	10.965	12.34	12.748	12.751	12.751	12.887	10.284	10.408	10.55	10.547	11.382		11	0.801021	0.745584
23	12.076	11.809	12.778	11.795	12.216	10.813	10.541	10.675	10.541	10.956	12.484	11.653	11.644	11.505	11.782	9.861	9.164	9.442	10.559	8.473	10.698	10.823	10.687	11.252	11.384	11.109	10.55	10.971	10.825	11.244	12.76	12.898	13.04	13.182	12.351	14.002	14.689	13.444	13.719	15.107	11.102	10.966	12.076	10.827	10.832		12	0.785017	0.846248
25	13.887	13.617	13.88	14.292	14.163	12.058	12.196	11.641	11.926	11.783	14.007	14.561	13.31	13.31	13.306	10.705	10.698	10.843	9.861	9.727	11.107	10.964	12.21	10.969	10.553	11.664	11.803	11.816	11.248	11.518	13.875	13.465	13.456	13.182	13.603	14.273	15.243	15.799	15.797	15.52	13.879	12.353	13.05	12.362	12.362		13	0.838949	0.777922
27	14.575	14.985	14.308	14.019	14.306	12.934	12.753	12.895	13.584	13.582	16.214	16.357	15.857	15.938	16.075	10.698	10.705	11.531	10.843	10.555	11.516	11.39	11.38	11.103	11.259	12.219	12.212	12.502	11.938	11.664	15.12	15.118	16.094	15.536	15.12	17.469	15.248	16.915	16.084	16.643	13.887	12.773	13.461	13.333	14.157		14	0.880329	0.825266
29	16.938	17.078	16.147	16.669	16.932	16.088	15.663	15.661	15.801	15.66	18.582	18.297	18.985	19.125	19.962	12.507	12.363	12.502	12.502	12.785	12.632	11.796	11.523	11.658	11.8	12.354	12.906	13.323	11.796	11.942	16.926	17.207	17.628	17.628	18.173	15.938	17.737	18.986	18.014	20.1	15.829	16.236	15.135	15.973	15.825		15	0.812773	0.907358
31	19.885	19.146	19.427	19.447	20.143	17.636	17.471	18.157	18.294	17.883	20.375	20.932	21.348	21.619	21.763	12.646	12.359	12.918	13.606	13.606	11.939	11.933	12.078	12.355	11.668	14.172	14.033	14.296	13.902	13.472	18.032	19.009	19.144	20.253	19.845	19.966	20.094	20.647	20.093	20.79	17.624	19.574	19.578	17.909	19.851		16	0.858153	0.828112
33	22.487	22.342	22.34	21.936	22.622	20.938	21.069	20.79	19.835	20.788	22.88	23.005	23.564	23.845	24.252	14.583	14.583	14.727	14.719	14.861	12.771	13.319	13.181	12.771	12.645	15.003	14.449	14.587	14.733	14.587	22.503	22.752	22.336	22.052	21.914	22.048	22.602	22.884	23.84	24.528	22.341	22.213	22.07	23.18	21.793		17	0.851017	0.842986
35	25.115	24.567	23.587	24.421	24.843	23.289	23.425	22.611	23.007	22.729	25.105	25.939	26.887	27.327	26.608	16.253	16.11	16.246	15.552	16.246	13.603	13.183	13.181	12.91	13.326	14.603	14.456	15.142	15.426	15.558	24.697	24.829	24.826	24.411	24.558	24.117	26.069	24.675	24.675	25.527	25.122	24.979	24.842	24.151	25.681		18	0.889848	0.894909
37	26.787	25.692	26.652	26.387	26.664	24.811	24.813	24.533	24.54	24.549	28.98	28.586	29.537	29.255	29.794	16.82	17.217	17.224	16.799	16.801	13.735	14.152	13.88	13.874	13.874	15.98	16.251	15.426	15.149	14.465	26.907	26.768	27.323	28.017	27.467	29.377	28.268	28.825	27.991	28.131	28.875	28.875	28.181	28.452	29.287		19	0.911838	0.958808
39	29.426	29.974	29.842	30.389	29.567	28.419	28.272	27.862	28.277	28.552	32.293	31.182	33.137	33.012	33.134	17.368	17.513	17.495	16.522	17.215	17.07	15.817	15.264	16.233	15.416	15.136	15.132	15.288	15.842	16.007	28.583	29.131	29.845	28.718	29.692	32.71	32.99	33.675	34.227	34.098	31.778	30.944	32.193	32.472	31.92		20	0.903219	0.880109
41	35.241	34.686	34.423	34.442	34.709	32.989	33.123	32.292	32.43	32.571	35.898	36.458	36.622	35.22	36.05	17.634	16.801	18.048	17.918	17.651	16.132	16.51	15.826	15.965	16.609	15.419	15.573	16.514	16.384	14.99	33.702	33.859	33.429	33.305	33.859	36.444	36.998	37.296	37.7	37.284	35.669	35.524	35.524	36.777	36.227		21	0.909502	0.980777
43	38.446	39.007	38.99	37.74	38.854	37.435	36.45	37.292	35.344	37.42	37.461	36.46	37.428	36.468	37.038	19.992	19.163	18.881	18.352	18.189	16.096	16.233	16.242	17.07	16.513	17.49	17.644	16.806	16.413	15.434	37.201	37.588	36.478	37.315	37.033	38.942	39.354	38.94	38.819	39.224	38.164	37.067	36.655	37.191	37.883		22	0.884836	0.890025
45						39.365	38.944	39.363	38.426	38.963	37.002	37.832	38.11	37.869	37.849	22.506	22.234	21.583	20.023	19.441	16.377	16.649	16.235	17.484	17.068	19.856	18.621	18.482	18.323	18.459	40.643	40.645	41.053	41.469	41.068	39.492	38.249	39.216	38.95	39.917	39.567	36.911	38.319	38.735	38.618		23	0.874313	0.922849
47																22.908	23.605	18.882	19.992	21.103	16.104	15.956	16.65	18.461	17.343	21.815	21.67	21.803	21.954	21.942																	24	0.92843	0.945095
49																24.022	21.381	23.192	25.98	26.106	20.13	19.436	19.147	21.937	20.962	23.34	24.04	24.317	24.715	22.898																	25	0.932772	0.897075
51																25.268	27.498	27.779	28.2	26.249	24.564	23.324	24.582	24.835	26.651	25.149	26.965	26.957	28.886	27.096																	26	0.794108	0.862861
53																28.05	29.176	25.963	26.526	25.684	27.058	26.097	26.919	26.509	27.068	27.902	27.505	29.154	29.852	29.975																	27	0.753725	0.77337
55																29.577	29.854	31.101	26.795	23.463						35.388	33.03	34.001	32.757	29.561																	28	0.763152	0.794888
56																32.922	29.435	28.061	27.217	28.603						35.248	35.25	33.029	35.116	28.867																	29	0.734088	0.753517
57																29.988	29.592	30.822	31.526	31.654						35.255	35.946	34.975	33.458	33.19																	30	0.752969	0.708292
58																33.599	32.217	34.583	34.305	38.604						36.229	34.429	34.971	34.832	35.113																	31	0.748009	0.717605
59																37.636	33.889	36.396	33.463	39.302																											32	0.70189	0.705369
																																															33	0.628321	0.663845
																																															34	0.591359	0.626944
																																															35	0.579078	0.557544
																																															36	0.502126	0.514875
																																															37	0.452815	0.424554
																																															38	0.385444	0.371282
																																															39	0.308247	0.3259
																																															40	0.276353	0.272762
																																															41	0.231105	0.222494
[truncated: 43 more columns]
