# Supplementary material for: Spatiotemporal recruitment of RhoGTPase protein GRAF inhibits actomyosin ring constriction in Drosophila cellularization
Source: eLife. 2021 Apr 9;10:e63535. doi: 10.7554/eLife.63535 (PMC8081525; doi:10.7554/eLife.63535)
Supplement: Figure 6—source data 1. [file elife-63535-fig6-data1.xlsx]

## Sheet: Figure 6-source data
Figure 6-source data 6B							Figure 6-source data 6D
Control early	GrafCR57 early	Control mid	GrafCR57 mid	Control late	GrafCR57 late		Control	GRAF-OE	GrafCR57	GrafCR57;GRAFDRhoGAP-GFP	GrafCR57;GRAF-GFP
3.806	4.508	2.46	4.778	1.587	3.765		1.67829	1.64783	1.90129	1.44682	1.39101
2.902	4.976	2.622	3.904	1.689	3.653		1.57165	1.89728	2.38777	1.45517	1.35238
3.375	5.132	2.679	3.764	1.655	3.277		1.71118	1.52617	2.23835	1.43641	1.24344
3.332	5.157	2.432	4.038	1.433	3.398		1.65009	1.68956	1.92165	1.51168	1.37132
3.066	5.292	2.698	4.202	1.53	3.106		1.54894	1.69165	1.98529	1.3442	1.26894
3.393	4.599	2.571	3.788	1.618	3.579		1.36482	1.6178	1.95914	1.58692	1.39706
2.844	4.698	2.376	3.742	1.384	3.797		1.46029	1.71384	2.31339	1.65127	1.27463
3.187	4.919	2.248	3.647	1.706	3.312		1.40688	1.44041	2.14323	1.74935	1.29512
2.869	4.749	2.408	4.42	1.354	3.09		1.23658	1.54709	2.09673	1.70798	1.27451
2.759	4.683	2.56	4.352	1.297	3.188		1.45323	1.6693	2.18112	1.68569	1.30631
1.183	4.567	2.233	5.707	1.289	3.211		1.59705	1.41378	1.91554	1.76866	1.15489
1.114	4.61	2.409	5.717	1.333	3.451		1.56764	1.24452	1.98027	1.52851	1.29703
1.113	4.47	2.453	5.509	1.268	3.179		1.6264	1.2687	1.91167	1.70295	1.14082
1.162	4.549	2.188	5.036	1.48	3.15		1.53914	1.44108	1.80116	1.78239	1.18461
1.113	4.699	2.455	5.859	1.322	3.39		1.55512	1.09431	1.84481	1.5134	1.17189
1.165	4.381	2.602	5.882	1.352	3.516		1.66324	1.20935	1.92382	1.67647	1.35105
1.228	4.387	2.193	6.067	1.195	3.34		1.63261	1.33049	2.05052	1.85683	1.18006
1.157	4.133	2.68	5.773	1.384	3.222		1.6938	1.22142	1.94088	1.78652	1.34162
1.119	3.823	2.176	5.586	1.411	3.437		1.60293	1.19501	1.95488	1.9104	1.2422
1.13	3.922	2.321	6.122	1.34	3.074		1.61958	1.28262	1.95988	1.89528	1.28302
1.321	5.171	2.692	4.294	1.377	3.628		1.40457	1.2266	2.10906	2.30594	1.1745
1.293	4.992	2.502	5.108	1.242	3.906		1.33961	1.2533	1.88241	2.21123	1.21297
1.351	4.696	2.512	4.484	1.201	3.773		1.47629	1.25945	1.95493	2.10674	1.2432
1.187	4.714	2.516	4.69	1.302	4.387		1.30427	1.13068	2.12717	2.02976	1.24964
1.297	4.601	2.716	4.227	1.293	3.857		1.39502	1.12773	2.06613	2.28709	1.4339
1.2	4.946	2.676	4.567	1.407	4.406		1.64226	1.25117	1.42964	1.92349	1.28632
1.296	4.418	2.451	4.512	1.457	3.714		1.56697	1.28726	1.37738	1.80453	1.2209
1.303	4.862	2.472	4.737	1.378	3.555		2.03719	1.24474	1.39108	1.69488	1.20921
1.2	4.368	2.85	4.491	1.251	4.693		1.56425	1.18915	1.43434	1.95493	1.15421
1.277	4.218	2.576	4.89	1.244	3.916		1.8711	1.04401	1.51759	1.6889	1.24232
							1.50491	1.31165	1.41706	1.76343	1.25639
							1.27297	1.31893	1.35682	1.75334	1.26319
							1.32728	1.3757	1.41757	1.70112	1.29136
							1.40585	1.30229	1.40366	1.77587	1.26785
							1.49184	1.20832	1.30991	1.92429	1.26219
							1.43776	1.45444	1.58248	1.6564	1.37619
							1.38831	1.4164	1.53779	1.68498	1.52385
							1.30636	1.29778	1.62761	1.63742	1.30703
							1.37431	1.51825	1.54751	1.7308	1.43908
							1.3313	1.33862	1.57742	1.68246	1.4418
							1.22328	0.64602	1.72719	1.63736	1.28861
							1.25684	0.578457	1.69715	1.69613	1.28598
							1.17222	0.606195	1.81067	1.83709	1.32053
							1.17928	0.543741	1.71716	1.79665	1.27202
							1.20788	0.592098	1.66241	1.62407	1.2542
							1.29405	1.06228	2.17049	2.15866	1.3706
							1.18245	1.11336	1.9555	1.83075	1.52232
							1.1221	1.03271	1.9734	1.79848	1.43084
							1.43792	1.10554	2.04792	1.88451	1.34896
							1.14328	1.02882	2.09198	1.89297	1.48999
							1.52485	1.28269	1.55185	1.39211	1.82078
							1.43382	1.25007	1.55862	1.30955	1.77641
							1.37073	1.28605	1.61496	1.38792	1.80221
							1.40031	1.29318	1.60836	1.28322	2.07595
							1.45426	1.28685	1.55155	1.40579	2.04771
							1.38586	1.27194	1.80319	1.49352	1.25598
							1.3887	1.06536	1.78723	1.45625	1.29204
							1.45327	1.09867	1.71801	1.36819	1.63701
							1.34838	1.07578	1.56741	1.39696	1.23984
							1.35643	1.16852	1.68795	1.28367	1.41261
							1.36379	1.3347	1.77665	1.53232	1.2835
							1.16031	1.23157	1.7513	1.58973	1.17998
							1.30559	1.25468	1.93305	1.39767	1.26921
							1.22239	1.14156	1.60062	1.68618	1.33236
							1.32418	1.09042	1.66152	1.35136	1.29793
							1.22854	1.23355	2.09605	1.71707	1.23391
							1.28874	1.18423	1.85661	1.59525	1.35003
							1.10895	1.17164	1.89557	1.4449	1.11742
							1.09703	1.13017	1.74221	1.58902	1.12082
							1.12596	1.1746	1.68631	1.68162	1.46775
							1.23708	1.33399	1.79425	1.46098	1.17366
							1.29858	1.21402	1.60375	1.55543	1.32583
							1.10692	1.28141	1.60306	1.6047	1.44046
							1.1378	1.21658	1.66092	1.48184	1.46774
							1.15165	1.13667	1.61774	1.23192	1.73874
