# Supplementary material for: Spatiotemporal recruitment of RhoGTPase protein GRAF inhibits actomyosin ring constriction in Drosophila cellularization
Source: eLife. 2021 Apr 9;10:e63535. doi: 10.7554/eLife.63535 (PMC8081525; doi:10.7554/eLife.63535)
Supplement: Figure 7—figure supplement 1—source data 1. [file elife-63535-fig7-figsupp1-data1.xlsx]

## Sheet: Figure 7-figure supplement 1
Figure 7- figure supplement 1B
Time(min)	Control															RhoGEF2i															RhoGEF2-OE
1	5.974	5.871	5.968	5.702	6.382	5.274	5.545	5.266	5.684	5.407	5.266	5.135	5.266	5.129	5.55	5.959	5.266	5.127	5.404	5.404	5.965	5.827	5.133	5.278	5.548	6.806	6.663	6.667	6.802	7.222	5.836	5.97	5.42	5.276	4.997	5.41	5.415	5.415	4.855	5.41
3	6.808	6.382	6.662	6.675	6.528	5.821	6.099	6.381	6.381	6.527	7.904	7.495	7.76	7.627	7.504	5.822	5.266	5.268	5.545	6.513	6.255	6.518	5.688	6.52	5.549	7.218	7.912	6.667	7.499	7.222	5.415	5.968	5.554	5.83	5.97	5.839	5.969	5.424	5.554	5.831
5	8.881	7.391	7.366	8.052	8.067	7.241	6.652	6.654	7.069	6.527	7.9	7.488	7.633	7.761	7.377	6.374	6.79	6.236	7.067	6.376	5.133	5.416	6.241	5.278	5.693	7.634	7.633	7.494	7.912	7.217	5.693	5.693	5.836	5.693	5.975	6.523	5.963	6.442	5.963	5.964
7	8.898	9.157	8.743	8.907	9.166	7.489	7.899	7.212	8.32	7.904	7.495	7.495	7.346	7.623	7.346	6.514	6.376	6.791	6.519	6.929	6.117	5.827	6.255	5.688	5.272	7.361	7.916	7.356	7.912	7.361	5.975	6.248	6.248	6.385	5.691	6.246	5.964	5.964	6.517	6.24	5.831	5.829	5.567	5.706	6.529
9	9.439	9.444	9.33	9.035	9.737	8.039	8.038	8.038	7.346	7.624	7.904	8.181	8.039	8.181	8.181	7.069	6.664	6.237	6.93	6.791	7.907	7.772	7.213	6.947	7.351	7.912	7.356	8.054	7.638	7.218	5.97	6.114	6.109	6.246	6.524	6.108	6.523	6.103	6.795	5.692	6.113	6.246	5.831	6.107	5.968
11	9.86	10.269	9.991	10.42	10.548	7.762	7.899	7.901	8.32	8.458	8.74	8.177	8.453	8.458	8.602	7.069	7.069	6.651	7.218	5.96	8.461	7.772	7.772	7.633	6.797	7.494	7.773	7.356	7.773	8.188	6.664	6.941	6.94	6.524	6.807	6.246	6.385	6.254	6.242	6.795	6.525	6.247	6.108	6.941	6.523
13	9.852	9.998	10.983	10.274	10.276	8.32	8.455	8.741	8.61	7.772	8.602	8.593	7.91	8.596	8.453	8.315	7.623	7.621	6.93	6.79	7.768	7.352	7.633	7.768	8.326	8.328	7.912	7.912	7.634	7.916	7.495	6.524	7.079	6.803	7.219	6.519	6.385	6.242	6.662	6.38	7.223	6.384	7.361	6.384	6.801
15	10.707	9.853	10.57	9.728	10.553	8.874	8.594	8.887	9.705	8.602	9.571	10.131	9.854	9.301	9.978	9.288	9.011	9.15	9.427	9.285	8.332	8.321	8.184	7.905	8.323	7.773	7.912	8.466	8.193	8.332	6.803	6.668	7.362	7.356	7.08	6.519	6.103	6.379	6.519	6.939	7.496	7.239	7.361	7.223	6.675
17	10.134	9.989	9.593	10.685	9.86	9.287	9.567	9.433	9.286	9.702	11.089	10.951	10.546	10.671	10.809	9.423	9.285	8.731	9.84	9.423	9.016	8.323	8.877	8.739	8.461	9.021	9.161	8.892	9.3	8.743	6.946	6.941	6.94	7.356	7.635	6.939	6.796	6.254	6.517	7.073	7.368	7.084	6.945	7.774	7.5
19	11.525	11.245	10.962	10.836	11.949	9.848	9.759	9.848	9.433	9.428	11.094	11.371	11.094	11.232	11.64	9.843	9.7	9.839	9.704	9.288	9.015	8.461	8.323	9.709	9.292	9.858	9.031	8.748	8.467	9.3	7.219	7.362	6.941	6.941	7.778	7.077	7.077	7.216	6.935	6.939	7.639	7.078	7.357	8.051	7.634
21	12.083	11.38	11.66	11.672	10.844	9.987	9.844	10.121	9.982	10.536	11.225	11.648	11.363	10.947	11.228	10.116	10.535	10.258	9.839	9.84	11.237	9.986	10.679	10.403	9.708	9.855	10.001	10.146	9.862	10.14	7.774	7.497	6.803	7.639	7.358	7.355	7.223	7.073	7.212	6.662	8.055	8.467	8.051	7.916	8.19
23	12.076	11.809	12.778	11.795	12.216	10.813	10.541	10.675	10.541	10.956	12.484	11.653	11.644	11.505	11.782	10.947	11.92	10.54	11.087	10.951	10.821	10.957	10.819	10.549	11.234	11.117	10.701	10.556	10.001	9.724	8.607	7.917	8.468	8.607	8.329	7.351	7.351	7.212	7.216	7.361	8.748	8.328	8.466	8.055	8.754
25	13.887	13.617	13.88	14.292	14.163	12.058	12.196	11.641	11.926	11.783	14.007	14.561	13.31	13.31	13.306	13.448	11.779	12.749	12.195	10.67	11.79	12.624	11.38	12.899	11.928	11.245	12.081	10.562	11.388	10.562	8.468	8.606	8.471	8.333	8.2	7.628	7.767	6.795	6.939	7.489	8.61	8.754	8.61	8.477	8.332
27	14.575	14.985	14.308	14.019	14.306	12.934	12.753	12.895	13.584	13.582	16.214	16.357	15.857	15.938	16.075	14.689	14.412	13.725	13.721	14.691	14.008	13.038	13.731	13.454	13.454	12.648	12.077	12.094	13.48	11.797	9.039	9.3	9.17	9.17	9.586	8.181	7.627	8.598	7.489	8.463	9.17	9.439	9.716	9.164	9.308
29	16.938	17.078	16.147	16.669	16.932	16.088	15.663	15.661	15.801	15.66	18.582	18.297	18.985	19.125	19.962	16.49	16.214	16.491	18.028	17.045	15.262	14.979	15.811	15.949	14.568	14.866	14.173	13.604	13.74	13.746	9.717	10.002	9.586	8.749	9.859	9.152	8.74	8.746	8.876	8.876	9.715	9.442	9.854	10.279	10.279
31	19.885	19.146	19.427	19.447	20.143	17.636	17.471	18.157	18.294	17.883	20.375	20.932	21.348	21.619	21.763	18.292	19.123	18.569	19.402	20.649	19.417	19.837	18.862	18.867	18.446	17.211	17.487	16.243	16.521	16.377	10.148	9.864	9.864	10.002	10.133	9.993	10.824	10.126	9.849	10.124	9.855	9.994	10.552	10.272	11.104
33	22.487	22.342	22.34	21.936	22.622	20.938	21.069	20.79	19.835	20.788	22.88	23.005	23.564	23.845	24.252	20.925	20.786	21.202	21.756	21.756	20.804	20.249	19.972	20.943	20.942	18.46	18.736	19.848	18.328	18.047	10.28	10.418	10.28	11.246	11.112	10.678	11.24	11.107	10.7	11.235	11.659	11.662	11.523	11.798	11.801
35	25.115	24.567	23.587	24.421	24.843	23.289	23.425	22.611	23.007	22.729	25.105	25.939	26.887	27.327	26.608	23.28	22.866	23.422	24.26	24.252	23.994	23.033	23.302	23.162	23.302	21.097	21.373	21.512	20.552	21.234	11.257	11.957	12.222	11.66	12.088	11.648	12.342	12.758	12.344	12.903	13.608	13.608	14.021	13.331	14.296
37	26.787	25.692	26.652	26.387	26.664	24.811	24.813	24.533	24.54	24.549	28.98	28.586	29.537	29.255	29.794	25.642	26.607	26.744	25.913	25.639	26.357	24.978	25.248	25.242	25.384	23.871	22.485	23.455	23.734	23.732	12.495	13.602	13.881	11.937	12.77	12.764	12.483	13.038	13.315	13.18	15.689	15.967	15.268	15.962	15.134
39	29.426	29.974	29.842	30.389	29.567	28.419	28.272	27.862	28.277	28.552	32.293	31.182	33.137	33.012	33.134	30.355	29.377	31.179	29.657	28.696	30.101	28.849	29.264	29.546	30.096	26.097	26.095	25.814	26.786	25.689	14.164	14.436	13.603	15.274	14.307	14.289	14.424	14.011	14.15	14.838	16.655	16.519	17.35	16.241	16.241
41	35.241	34.686	34.423	34.442	34.709	32.989	33.123	32.292	32.43	32.571	35.898	36.458	36.622	35.22	36.05	34.096	33.953	34.653	33.968	32.445	32.593	32.593	32.6	32.184	33.57	29.425	31.09	29.979	29.84	29.577	15.824	16.384	16.24	17.212	15.824	14.424	14.704	14.704	14.704	14.838	18.043	17.77	17.074	17.629	17.627
43	38.446	39.007	38.99	37.74	38.854	37.435	36.45	37.292	35.344	37.42	37.461	36.46	37.428	36.468	37.038	34.506	33.539	34.367	34.228	34.23	36.062	35.783	36.337	37.033	36.757	33.172	32.48	33.588	32.615	33.322	16.517	18.046	16.936	17.352	18.183	15.541	15.813	15.813	16.365	16.779	19.3	19.019	19.023	19.431	19.431
45						39.365	38.944	39.363	38.426	38.963	37.002	37.832	38.11	37.869	37.849						37.73	37.586	37.171	36.478	37.03	34.696	34.835	35.807	36.778	35.254	17.355	17.767	17.211	17.769	17.628	16.365	16.784	16.779	17.057	17.474	22.084	21.653	21.933	21.933	22.347
