# Supplementary material for: Spatiotemporal recruitment of RhoGTPase protein GRAF inhibits actomyosin ring constriction in Drosophila cellularization
Source: eLife. 2021 Apr 9;10:e63535. doi: 10.7554/eLife.63535 (PMC8081525; doi:10.7554/eLife.63535)
Supplement: Figure 7—source data 1. [file elife-63535-fig7-data1.xlsx]

## Sheet: Figure 7-source data
Figure 7-source data 7C
Time(min)	Control															GRAF-OE;RhoGEF2-OE															GRAF-OE															RhoGEF2-OE
1	32.549	36.985	37.618	32.875	38.329	33.34	31.299	28.701	35.726	33.725	26.409	29.636	28.253	30.903	28.752	26.547	28.891	32.829	31.234	30.024	34.008	29.781	26.572	28.052	32.663	29.66	39.566	28.176	31.471	26.73	21.123	28.787	27.708	23.049	26.726	37.913	35.605	33.797	35.086	32.643	22.6	20.584	19.144	20.2	23.887	33.976	31.611	32.938	39.303
2	40.038	35.333	32.453	35.852	36.121	36.285	32.839	33.224	34.225	37.902	27.427	28.118	30.653	28.08	28.368	31.1	32.387	31.868	30.524	31.58	30.146	29.608	29.051	31.529	29.032	32.705	37.446	34.805	36.521	35.711	27.535	26.168	27.266	25.937	23.8	33.297	37.509	34.739	34.047	32.874	21.928	22.024	19.086	18.894	22.6	34.265	35.995	33.303	32.669
3	37.177	32.971	34.469	34.181	37.676	38.826	35.38	30.144	34.591	28.2	26.447	24.546	25.41	23.182	25.871	31.714	33.559	34.557	33.578	34.884	31.76	28.244	32.048	33.604	30.473	39.951	34.439	35.133	36.405	36.482	30.269	26.091	25.244	26.284	25.34	34.297	37.99	35.99	33.874	36.22	25.384	24.866	23.963	24.904	19.048	28.535	30.804	28.304	30.4
4	39.231	35.583	31.435	39.251	30.763	36.978	33.34	33.455	32.454	39.807	23.163	29.405	25.813	25.18	28.157	27.796	30.6	30.985	32.022	30.408	31.011	33.989	31.414	29.954	32.183	33.09	35.037	37.099	40.722	35.865	35.488	32.753	28.902	34.64	32.195	35.586	33.201	33.143	37.413	33.681	33.948	30.895	30.338	30.185	29.071	31.342	30.15	27.573	27.458
5	32.376	32.568	32.28	37.023	33.759	30.548	31.896	34.264	34.09	33.07	26.543	27.523	26.985	26.697	25.602	32.406	31.042	33.002	32.521	31.369	30.569	30.876	32.279	33.585	34.219	37.234	33.36	38.602	37.619	38.255	35.237	33.909	32.234	34.275	34.044	40.183	40.952	37.182	43.626	40.645	32.258	31.049	32.201	31.817	37.577	27.939	28.054	29.996	29.515
6	30.878	35.487	32.261	30.648	34.277	32.55	33.571	34.514	33.975	33.07	24.488	23.24	27.216	24.296	27.331	33.213	33.578	31.907	32.809	34.135	36.025	33.7	33.066	34.892	33.662	35.172	37.022	38.64	39.315	38.409	32.522	37.452	31.174	35.545	30.982	37.836	37.644	42.799	42.722	39.24	34.467	30.588	32.047	30.434	31.682	26.727	26.631	28.016	28.516
7	33.759	30.821	34.296	33.835	31.185	30.587	31.723	33.07	32.146	32.531	26.505	22.568	26.37	28.522	26.716	32.886	31.177	32.387	31.561	32.694	35.103	34.219	35.237	30.223	37.293	38.583	33.572	38.506	32.897	34.902	37.818	35.622	29.634	35.565	34.602	42.645	40.106	40.568	44.473	40.741	32.047	34.121	36.56	37.232	32.162	21.42	28.881	26.958	30.996
8	31.896	34.411	31.013	32.51	29.688	35.919	30.548	28.393	31.357	28.547	27.35	28.752	24.623	28.522	26.947	35.383	31.465	29.659	31.542	31.58	35.199	33.047	36.102	35.295	28.859	26.461	35.75	37.927	33.533	39.739	35.199	36.373	34.275	33.389	40.09	43.549	41.01	39.856	37.432	35.97	33.468	35.369	33.199	32.316	33.314	28.669	27.939	31.573	28.708
9	30.033	32.28	29.246	32.818	33.816	27.95	27.7	31.184	31.318	33.205	25.218	25.583	27.619	24.411	26.198	31.042	30.043	31.177	27.777	32.502	33.009	33.796	33.585	34.892	34.488	34.112	33.186	37.176	30.161	40.491	40.186	31.598	44.961	36.624	40.956	35.682	39.664	41.587	39.337	42.03	34.755	35.062	34.14	32.489	37.385	20.055	25.035	28.612	27.15
10	32.03	31.377	27.902	30.84	35.333	32.3	32.685	30.048	28.527	29.393	25.007	27.888	26.87	26.889	26.428	34.25	30.255	32.521	32.176	33.232	33.374	32.893	31.856	33.547	35.449	36	37.234	39.354	33.244	31.105	47.773	43.325	40.244	39.454	35.103	37.336	39.587	38.125	40.337	41.703	32.297	35.273	33.987	33.007	41.61	29.919	24.497	26.477	26.304
11	30.801	26.097	27.748	26.73	29.611	34.802	30.279	30.991	31.28	33.994	25.737	27.388	27.119	26.121	22.164	32.137	31.964	33.424	32.925	30.331	31.491	34.469	31.99	31.779	32.471	28.523	31.124	31.182	33.456	34.439	43.171	40.475	39.3	43.459	41.033	39.567	37.125	40.145	40.241	36.951	33.852	31.932	35.35	35.062	36.156	20.478	27.9	25.612	28.669
12	28.651	30.859	27.556	31.262	30.321	32.57	28.816	32.127	32.3	33.109	28.656	27.753	26.524	27.484	24.431	33.366	31.561	30.716	32.003	32.56	36.775	33.47	31.798	34.68	32.509	31.548	34.69	32.3	34.902	32.84	45.847	38.53	41.938	41.534	42.535	39.952	39.067	39.779	37.759	42.549	35.215	38.096	32.585	32.508	33.026	25.497	24.516	27.208	25.093
13	33.567	28.497	26.673	29.188	29.726	33.032	32.724	28.893	28.604	30.664	26.351	24.93	22.894	24.911	27.58	31.33	30.562	32.56	31.35	33.712	30.473	34.623	35.795	35.929	34.181	34.246	31.317	33.572	30.527	34.458	41.688	42.651	43.941	43.19	42.015	42.472	37.721	39.875	42.684	42.472	33.046	35.676	38.096	36.732	38.441	29.054	23.478	34.13	21.997
14	30.34	27.038	28.228	27.594	27.883	32.916	29.894	29.663	31.877	28.181	27.427	25.16	24.258	27.388	23.778	29.179	29.083	30.331	30.159	29.294	31.721	33.893	35.583	33.7	36.044	27.52	28.137	29.891	33.476	30.508	40.725	39.724	41.149	43.44	44.172	42.126	42.587	37.817	39.664	42.895	35.311	34.025	35.407	34.255	32.892	24.843	26.15	28.246	23.689
15	29.15	26.788	27.191	30.725	25.905	31.992	30.741	27.565	26.506	31.184	27.696	24.584	26.466	24.354	24.239	29.717	33.712	32.06	30.908	28.833	34.603	35.737	32.432	35.564	36.64	30.932	28.388	29.91	35.191	28.715	38.915	40.667	41.245	44.364	36.123	42.799	39.125	39.51	40.337	42.376	36.003	32.566	33.026	33.122	37.308	29.862	24.574	21.497	21.69
16	27.614	26.654	29.38	26.826	25.021	30.375	31.703	30.029	28.854	33.032	23.97	23.182	22.03	24.68	25.141	30.888	30.485	31.369	29.582	28.891	35.66	34.527	32.355	34.507	37.62	33.244	32.281	28.812	31.067	25.574	41.284	39.859	43.498	38.068	40.167	38.933	43.145	38.663	43.53	35.874	35.676	35.523	35.542	31.894	34.102	26.285	26.766	22.343	26.516
17	22.755	26.769	26.404	26.269	27.364	30.702	27.95	30.317	28.258	29.393	25.199	22.779	21.012	25.103	24.68	31.273	30.408	29.256	32.502	29.333	33.182	36.736	35.391	35.872	35.295	28.484	29.602	31.124	28.195	27.482	40.59	36.72	40.937	43.151	43.363	39.414	43.761	39.183	40.241	40.702	33.161	32.93	35.503	31.97	34.447	23.382	27.516	20.843	25.304
18	26.193	24.196	26.481	25.693	25.847	27.411	30.799	30.298	30.202	30.606	27.773	26.198	26.582	25.237	22.011	30.869	30.927	31.599	32.56	30.062	38.657	36.678	37.505	35.295	34.738	29.872	27.867	28.388	29.602	32.917	42.862	40.051	39.358	42.747	42.458	43.241	37.913	39.452	36.855	38.663	31.874	32.911	35.58	32.93	32.489	26.016	29.439	25.362	29.419
19	24.522	24.618	25.674	29.803	26.423	30.606	30.414	28.45	28.065	29.855	25.66	23.874	24.277	27.427	22.721	31.926	31.714	29.313	29.275	33.251	37.12	36.121	32.144	32.836	34.834	26.345	29.583	29.563	30.469	29.987	41.977	42.112	37.798	36.489	38.607	38.163	38.913	38.259	38.894	42.049	34.639	36.464	33.891	36.982	34.908	24.343	24.035	19.113	29.631
20	29.534	23.984	25.521	23.677	24.215	30.144	29.49	28.219	27.911	27.95	22.875	25.525	24.757	24.623	24.392	29.371	30.773	29.928	28.526	26.778	34.565	34.162	35.372	36.083	35.814	27.771	27.077	28.715	29.795	28.156	41.476	40.879	41.707	35.815	39.82	39.394	37.432	38.798	41.645	41.799	35.407	34.505	33.372	31.51	33.218	18.709	22.805	23.285	23.92
21	23.255	27.326	25.348	22.755	24.138	28.72	24.831	25.428	29.547	24.081	25.18	25.18	24.162	22.664	25.698	29.275	28.046	28.545	32.464	30.216	32.49	33.758	32.893	35.679	32.24	26.056	20.293	25.902	23.107	23.3	37.509	42.092	41.957	35.719	38.588	37.067	39.106	38.144	38.24	39.452	33.833	33.43	32.546	34.486	37.097	25.016	22.132	17.094	24.055
22	21.699	23.005	24.791	26.077	24.599	28.604	26.622	28.893	28.046	26.583	22.856	24.219	24.008	22.606	23.221	28.679	30.6	28.238	29.313	29.717	32.394	32.836	33.009	35.968	34.853	23.049	25.362	23.666	25.535	24.649	37.895	39.859	40.224	40.687	37.779	39.721	38.144	38.259	38.856	38.625	32.546	37.75	36.944	33.161	34.505	21.805	20.747	20.401	24.305
23	23.773	21.046	24.061	24.119	21.661	29.278	25.505	25.351	24.928	28.296	21.857	24.738	23.912	23.95	24.008	28.161	27.45	27.757	29.717	30.331	32.874	34.104	35.161	33.72	32.586	22.702	25.189	25.111	27.983	25.863	38.915	38.761	41.052	39.165	37.933	39.144	39.356	38.336	39.933	37.24	34.908	35.945	36.233	34.083	33.526	23.247	19.882	20.651	26.708
24	21.469	23.101	23.965	22.275	23.639	26.352	29.066	25.678	25.582	25.601	26.678	24.431	24.219	23.797	24.834	28.872	29.525	28.968	27.143	30.908	31.76	33.009	32.721	34.334	32.144	21.527	27.887	22.799	22.645	25.69	38.087	41.399	36.855	35.006	37.529	37.817	41.876	38.048	37.375	35.239	35.177	33.353	35.446	36.368	33.103	20.247	18.882	23.459	18.728
25	23.485	22.583	24.388	30.552	21.296	29.066	26.891	28.181	26.333	25.794	24.603	25.122	22.971	24.104	24.066	29.794	28.065	30.543	29.236	28.737	30.338	32.086	30.319	34.757	33.431	19.503	24.109	26.017	25.632	23.493	38.549	37.914	39.493	40.494	38.183	40.529	36.24	41.01	40.548	37.836	34.083	33.161	33.718	29.359	36.137	18.94	20.074	16.421	18.401
26	23.351	20.701	22.41	22.41	19.856	27.565	28.739	27.18	28.258	24.716	24.968	23.278	24.181	23.97	26.774	26.566	29.563	28.046	27.738	28.18	31.779	31.568	32.49	33.604	32.874	23.531	22.105	23.628	20.081	24.495	40.128	39.531	41.611	38.646	37.625	40.337	36.855	37.375	37.894	41.299	35.292	32.642	31.145	31.337	35.081	16.325	15.786	19.344	19.459
27	20.873	22.775	21.987	23.389	22.832	28.854	28.008	25.621	24.466	25.082	24.392	25.16	26.294	25.948	26.159	27.104	28.718	29.044	27.008	26.758	32.279	32.298	31.28	31.837	32.99	21.7	24.032	18.713	20.216	22.317	37.394	40.321	40.975	36.412	36.085	39.221	36.432	40.837	37.894	37.99	33.353	29.916	36.502	37.827	35.83	16.902	15.921	14.902	13.171
28	22.871	21.488	22.755	20.24	22.006	23.561	26.487	24.119	27.103	25.486	22.856	26.102	25.084	23.451	22.529	26.509	26.951	22.532	27.2	26.49	34.296	32.932	33.201	34.7	30.838	21.739	22.356	20.467	21.122	22.818	41.207	38.973	39.165	40.205	37.355	39.51	36.951	38.317	39.587	39.567	36.521	30.434	35.407	36.041	33.967	13.171	19.594	13.864	16.806
29	21.315	20.317	21.834	21.968	19.203	27.584	26.487	25.794	23.426	24.1	25.89	25.641	21.569	24.757	25.276	27.604	25.625	24.934	24.146	25.433	31.721	30.357	31.28	31.183	33.143	19.022	21.72	19.079	19.58	24.553	37.028	38.819	36.893	37.567	36.72	38.183	36.721	37.99	37.125	40.125	29.532	36.944	35.945	32.508	32.412	15.786	12.96	16.402	12.46
30	20.509	20.758	16.591	21.68	20.009	23.484	26.506	25.967	26.102	25.794	24.469	25.871	25.506	25.621	23.989	25.395	23.666	24.3	24.377	25.471	29.646	33.624	30.78	30.53	32.855	18.713	20.795	22.471	20.024	19.06	39.608	35.565	37.702	41.63	40.302	35.913	37.182	39.606	36.778	38.798	36.156	32.393	31.721	40.054	37.673	13.979	14.075	11.652	12.114
31	14.652	19.184	21.43	22.026	21.45	26.294	23.08	26.737	24.1	27.103	27.773	26.505	22.433	25.583	23.835	22.936	24.607	24.127	24.3	20.919	29.839	27.11	31.376	29.8	31.356	16.401	19.118	18.077	20.39	23.531	37.452	36.643	37.529	39.916	37.933	35.836	38.202	41.279	39.394	37.221	36.406	30.511	29.877	37.059	33.161	11.652	9.903	12.71	14.671
32	21.104	20.739	20.336	17.609	19.049	20.192	20.558	26.121	22.368	25.89	24.565	26.274	25.295	24.968	21.838	23.166	22.821	21.937	21.245	24.261	29.204	28.859	31.068	28.225	26.534	18.366	14.685	16.709	18.829	18.944	39.262	36.643	36.296	36.489	35.988	36.413	35.893	39.51	36.624	39.125	31.145	35.849	28.437	34.697	32.143	11.883	12.806	12.345	12.537
33	18.915	20.317	20.374	16.265	19.625	19.499	23.907	24.639	19.692	20.154	21.838	22.856	24.661	25.449	25.564	19.862	23.128	22.225	20.708	22.917	27.687	29.147	26.784	27.398	26.265	16.555	14.917	16.921	15.379	19.291	38.299	37.683	38.549	37.009	37.818	36.471	35.855	36.798	34.855	37.971	28.917	25.98	32.508	31.49	34.639	13.306	11.306	10.21	10.845
34	20.24	19.721	20.144	17.724	15.535	23.253	17.748	22.984	19.981	20.231	22.644	24.796	23.451	24.968	23.739	19.709	21.053	18.748	20.227	19.017	26.284	27.11	27.802	25.592	25.035	17.287	17.884	17.152	15.051	14.358	34.987	37.818	37.856	36.065	33.928	35.547	36.278	34.528	34.297	34.682	35.254	38.499	30.684	28.457	28.725	11.595	10.883	10.268	10.037
35	18.147	18.147	14.997	18.78	19.606	17.998	23.58	17.478	20	18.729	24.661	22.164	24.488	25.218	25.026	18.114	19.939	18.172	19.882	19.824	22.787	22.499	23.844	24.247	23.325	16.323	16.497	13.568	14.589	14.936	33.254	34.891	35.834	32.137	35.083	36.817	34.162	35.278	34.258	33.72	25.73	34.14	27.228	32.815	28.917	9.806	8.96	6.711	10.287
36	13.903	14.671	18.339	18.972	18.108	18.498	17.055	22.271	18.229	18.113	23.048	23.125	21.934	25.237	23.95	17.788	17.922	16.155	15.732	18.422	23.268	20.001	21.73	19.482	21.327	14.512	15.533	15.572	15.996	14.878	31.483	34.929	34.198	31.463	37.009	33.258	32.893	34.585	35.009	34.335	31.682	27.228	28.053	31.721	30.415	7.807	9.653	5.134	7.864
37	16.783	17.206	14.517	14.306	15.285	16.612	20.135	15.784	21.675	17.382	25.564	25.372	24.911	22.913	24.661	16.424	17.346	17.634	18.921	15.579	17.945	16.793	13.046	18.483	19.175	12.565	11.062	12.662	12.064	11.929	34.679	35.16	30.635	32.445	35.141	35.182	33.124	33.816	32.662	34.585	28.322	27.9	25.749	26.632	34.447	5.884	6.172	8.095	6.076
38	14.21	16.783	15.881	16.13	14.46	16.285	17.882	16.708	16.574	18.729	24.315	21.838	18.515	19.418	21.377	15.041	15.617	15.348	14.388	13.062	16.889	17.35	17.119	14.621	14.007	10.773	10.272	10.754	12.816	9.559	33.004	29.326	31.194	30.346	35.892	33.604	31.777	33.316	32.104	33.681	25.288	24.501	24.943	27.266	25.192	7.23	4.942	6.23	5.249
39	14.191	15.017	11.771	12.731	13.768	13.744	16.343	17.036	16.227	18.595	21.78	21.185	19.821	19.629	19.552	12.544	10.872	11.967	11.66	11.43	11.298	12.431	10.414	11.816	13.046	10.388	8.133	9.867	9.52	7.073	24.666	31.117	28.286	30.058	31.444	30.738	34.047	32.316	30.988	31.2	34.198	26.901	22.562	24.021	24.251	4.749	3.288	1.538	6.422
40	11.061	10.35	13.615	9.179	11.963	15.014	11.992	14.456	17.536	13.994	17.689	18.4	16.133	19.533	18.15	11.065	10.085	11.737	9.566	10.181	12.719	10.817	10.183	8.627	11.163	9.463	10.272	9.597	7.516	10.041	26.226	26.284	26.553	27.343	23.954	30.142	32.162	30.854	28.084	31.258	25.845	22.216	22.619	29.301	23.368	3.5	3.269	2.846	1.538
41	8.776	6.414	7.681	7.259	5.07	12.088	13.474	13.879	13.648	16.959	16.594	16.364	13.79	12.772	13.368	9.374	8.798	9.605	10.834	11.314	8.838	8.973	7.474	9.434	6.936	12.469	11.698	11.428	11.929	12.43	25.109	25.109	26.63	23.338	22.548	28.257	32.874	29.411	27.699	27.622	23.599	23.695	23.675	26.421	21.678	2.423	2.192	1.308	2.057
42	7.412	6.471	5.722	5.665	4.916	15.245	12.512	15.149	16.477	15.958	15.961	14.213	11.255	12.542	11.293	10.776	10.085	12.256	12.294	8.759	8.55	9.011	6.321	5.726	4.554	13.76	9.443	9.559	6.919	8.133	26.072	18.562	19.698	19.583	17.137	26.93	26.91	26.603	27.661	23.217	21.947	30.453	22.331	23.003	30.242	2.365	1.981	2.365	1.788
[truncated: 15 more columns]
