# Supplementary material for: Spatiotemporal recruitment of RhoGTPase protein GRAF inhibits actomyosin ring constriction in Drosophila cellularization
Source: eLife. 2021 Apr 9;10:e63535. doi: 10.7554/eLife.63535 (PMC8081525; doi:10.7554/eLife.63535)
Supplement: Figure 8—source data 1. [file elife-63535-fig8-data1.xlsx]

## Sheet: Figure 8-source data
Figure 8-source data 8C
Time(min)	Control															GrafCR57															GrafCR57;RhoGEF2i															RhoGEF2i
1	33.527	34.299	41.181	27.589	32.332	25.271	22.448	24.215	28.343	22.006	37.07	33.218	32.602	33.334	32.544	24.562	25.967	24.504	24.639	28.008	34.721	26.075	27.981	33.97	35.318	38.086	31.822	31.572	35.523	31.34	25.965	27.909	26.157	30.238	24.098	26.152	32.151	30.498	30.863	28.652	27.771	27.906	27.791	29.062	27.194	32.879	29.893	28.949	28.314
2	31.349	23.791	30.423	27.647	29.536	28.382	34.872	29.342	30.302	29.937	36.376	40.112	36.723	37.397	31.042	23.792	25.833	23.542	26.064	26.737	31.139	26.98	34.606	32.757	34.009	30.646	32.709	36.14	28.16	30.646	27.967	38.418	30.469	27.312	27.659	30.901	30.267	29.209	29.229	33.055	31.257	29.813	29.736	29.794	28.022	41.122	31.415	30.028	30.471
3	31.04	37.017	33.566	37.21	36.053	34.469	26.558	31.243	30.494	25.444	30.696	26.498	28.481	32.583	33.546	26.526	25.332	26.295	26.275	27.815	34.548	26.941	22.801	31.755	30.33	24.093	35.735	38.395	25.153	31.649	31.297	30.373	29.141	29.891	29.911	29.575	31.786	32.69	30.555	31.517	35.283	33.8	31.758	30.14	31.142	29.604	32.59	32.879	28.294
4	35.59	32.872	32.795	35.282	32.968	35.141	29.246	30.801	34.335	32.376	31.986	34.509	37.551	32.679	30.079	24.543	24.678	25.236	24.062	26.757	29.618	20.355	33.932	25.246	25.073	35.214	33.884	25.963	28.507	35.6	32.49	31.739	29.064	26.966	26.003	29.305	32.536	36.978	33.286	31.651	30.968	32.105	28.003	29.89	29.409	34.323	27.543	29.508	34.496
5	32.795	30.539	33.624	31.137	33.2	36.793	33.605	32.491	28.939	28.382	32.429	29.714	37.359	34.47	33.449	25.351	24.485	23.715	26.949	21.598	32.68	29.156	26.806	25.169	29.791	31.533	32.381	25.866	31.36	26.522	27.235	30.161	28.121	28.64	30.276	34.017	32.594	31.863	32.805	33.209	28.869	29.697	30.872	32.586	33.588	35.267	30.124	32.898	28.564
6	32.255	31.407	30.385	41.721	29.961	34.988	29.188	30.072	37.772	37.023	28.828	37.205	31.909	31.87	35.818	25.563	22.483	27.219	24.735	28.431	31.64	24.322	29.233	23.07	18.622	24.132	23.881	25.982	23.284	29.143	30.373	28.236	29.256	25.618	28.891	32.824	33.786	33.113	35.497	31.651	30.487	29.89	33.414	34.146	28.426	32.609	29.97	33.264	29.643
7	32.004	33.624	32.043	33.238	37.807	37.561	37.119	38.924	40.691	39.692	33.796	32.91	28.346	38.341	36.473	23.33	23.619	23.965	22.002	29.452	33.527	28.366	24.495	23.898	24.418	28.083	18.638	22.493	20.045	27.89	28.101	28.467	30.488	27.813	28.621	29.882	32.171	32.382	36.401	35.843	33.973	36.823	33.992	30.083	31.7	32.956	35.074	32.744	28.622
8	33.47	29.17	33.932	28.303	30.134	37.388	34.719	29.956	38.79	29.688	34.027	31.928	30.888	39.246	28.905	22.252	25.987	21.906	21.694	23.195	40.691	19.797	30.157	23.013	23.783	24.17	16.73	26.367	16.942	28.835	26.234	31.566	29.372	30.623	33.722	31.401	35.728	31.171	38.882	37.151	32.798	34.416	32.451	34.474	31.45	34.959	29.2	33.013	31.877
9	30.038	34.858	39.138	34.183	32.062	43.437	38.06	36.735	37.772	38.828	42.154	31.485	33.026	34.797	31.947	22.849	20.462	18.999	21.232	20.289	28.905	19.643	19.816	23.109	19.835	22.725	20.277	22.647	26.791	14.013	34.703	37.186	30.257	33.587	32.22	30.901	30.036	32.401	33.882	36.305	37.151	35.379	33.761	35.456	37.825	30.105	37.251	35.825	36.211
10	37.634	34.665	40.333	29.402	39.793	33.624	34.93	28.516	32.242	36.082	35.356	37.898	34.817	35.857	37.686	17.344	20.847	18.402	20.212	20.25	26.017	25.42	18.66	23.802	23.109	19.332	21.433	21.009	16.788	27.543	27.87	31.72	35.569	33.164	31.393	35.017	31.767	35.343	34.036	33.478	36.149	31.18	40.29	33.723	29.37	31.28	36.654	31.954	37.829
11	34.434	33.257	30.173	34.742	38.367	35.544	40.345	33.586	33.182	35.736	39.727	37.012	38.148	36.03	35.779	21.309	20.539	21.771	18.961	16.169	20.548	24.958	15.868	23.205	16.658	21.877	18.735	22.898	16.846	13.261	31.104	36.551	32.894	32.086	29.988	30.132	35.536	30.575	35.17	34.882	35.167	36.438	37.016	33.992	36.38	41.238	41.296	41.334	36.249
12	44.382	28.842	34.665	34.299	36.843	38.463	34.488	39.615	30.993	32.971	34.297	33.372	40.555	37.493	40.613	18.056	17.844	14.88	13.783	14.899	19.662	23.667	18.969	17.524	28.867	20.527	15.67	15.882	20.778	21.414	32.297	33.279	33.279	35.685	29.449	33.555	33.267	35.363	33.074	29.844	34.666	30.968	34.204	34.859	34.358	39.254	37.559	41.257	38.772
13	34.8	37.248	32.737	31.137	35.725	38.636	36.005	35.103	37.868	35.237	38.649	40.69	33.084	40.883	34.162	12.801	11.973	13.821	12.782	15.65	23.995	21.356	21.087	20.008	23.918	19.66	15.998	13.55	12.528	23.9	36.32	33.606	33.375	37.706	35.55	31.401	35.074	35.151	36.286	34.459	32.663	34.281	34.994	36.708	36.168	43.722	44.05	47.787	35.922
14	30.905	32.583	29.787	38.386	31.889	36.217	33.567	29.976	39.097	33.951	36.28	33.68	33.854	42	41.21	10.164	11.049	12.916	13.494	17.324	14.52	18.16	22.57	18.892	22.011	19.14	17.443	15.535	19.467	17.81	32.105	36.705	29.218	30.373	35.319	30.055	32.844	34.151	36.478	33.767	36.149	30.275	29.89	34.031	36.322	49.809	41.989	47.247	43.722
15	32.833	27.165	36.4	32.949	41.471	36.562	37.426	40.288	33.951	39.788	31.89	40.632	38.052	29.117	39.804	12.685	14.033	17.344	14.822	18.864	19.874	27.461	14.462	18.814	17.909	15.901	17.424	15.42	14.379	21.067	32.567	31.874	33.625	34.376	37.109	29.921	31.498	31.382	34.632	31.901	32.991	31.334	33.8	29.794	33.588	40.448	40.891	42.259	41.334
16	33.45	30.713	37.923	29.922	39.041	32.222	39.558	36.639	29.937	30.494	39.65	35.991	32.91	35.067	30.946	15.9	17.498	19.577	19.192	11.55	20.509	22.03	17.967	19.084	17.717	16.75	15.554	17.251	16.171	14.726	34.376	34.184	31.277	35.185	36.628	32.036	29.325	30.305	30.44	34.94	34.088	33.376	32.066	32.317	32.605	45.687	46.034	45.514	43.106
17	38.424	27.859	32.737	35.552	26.278	42.899	32.702	35.909	32.587	29.707	31.851	32.159	31.755	33.334	34.817	15.476	13.898	12.839	19.115	17.786	26.267	20.355	17.004	19.065	19.7	16.672	15.208	15.593	17.829	13.897	30.681	31.239	33.183	32.336	30.969	28.094	28.94	35.94	32.94	31.94	29.582	28.811	35.109	31.488	34.647	44.743	41.142	43.145	42.509
18	33.45	26.895	28.553	38.964	36.959	34.584	37.196	31.07	37.119	34.2	31.504	33.122	36.896	34.181	34.316	14.63	14.418	13.282	15.765	11.896	23.013	20.201	15.676	19.797	19.296	16.422	14.803	15.4	17.732	15.94	33.375	32.009	36.84	33.087	31.297	29.555	29.286	34.613	34.805	31.459	28.792	32.124	31.315	34.628	33.241	45.225	43.472	40.159	44.358
19	33.103	35.07	23.367	29.594	28.842	36.159	38.463	34.892	32.069	36.217	32.852	39.169	32.621	32.525	36.203	15.303	10.799	12.705	11.184	12.897	23.032	17.852	16.33	19.257	16.465	14.803	13.28	13.376	15.111	10.601	34.761	32.259	34.049	30.315	32.182	27.786	30.555	33.594	32.882	35.055	28.677	34.031	27.367	31.007	29.1	45.34	47.613	41.219	47.71
20	27.57	30.558	24.929	31.272	29.151	36.581	32.645	37.868	38.156	30.609	29.637	31.87	29.945	28.327	26.883	13.398	12.416	13.282	18.191	11.877	15.887	18.757	19.912	15.676	14.231	14.861	14.437	11.526	15.651	16.306	30.623	35.262	33.375	33.625	28.987	34.555	29.113	34.594	32.248	34.363	29.89	29.928	30.044	33.029	27.444	42.702	44.185	43.915	46.708
21	25.314	25.333	24.061	23.483	25.353	37.407	33.663	31.627	36.639	40.499	30.619	35.934	29.425	31.216	30.619	11.28	14.283	15.592	12.512	13.186	16.388	19.219	20.317	15.868	19.508	15.458	14.051	14.552	17.79	10.408	31.143	30.546	29.218	35.05	33.568	30.305	30.305	36.728	32.421	31.228	29.197	28.137	26.905	27.155	26.847	45.957	44.994	41.623	40.101
22	26.201	25.044	24.832	29.363	26.76	28.401	35.89	29.668	36.505	33.471	27.056	30.041	30.002	28.847	25.438	12.57	16.728	14.745	13.59	15.149	15.002	18.41	14.077	19.604	19.912	14.167	13.376	15.111	14.841	17.366	33.722	31.989	32.567	29.564	30.392	33.171	28.729	30.402	27.133	33.844	28.214	27.54	29.12	28.503	26.212	43.279	47.517	44.223	44.05
23	27.589	25.199	26.047	22.557	22.172	31.934	26.558	29.438	33.106	30.052	31.504	31.658	27.98	28.616	28.231	14.129	15.169	15.65	12.3	15.842	16.735	17.794	18.795	20.74	16.234	15.034	11.622	17.443	13.531	9.791	33.606	31.066	31.739	30.353	30.315	30.44	28.132	32.921	29.69	25.729	23.727	27.194	25.653	28.003	26.443	40.602	39.158	39.042	41.315
24	20.475	22.326	23.772	26.49	23.136	29.726	28.804	30.705	25.809	26.922	28.731	29.02	28.211	25.689	25.342	13.802	12.685	13.359	15.823	14.283	17.813	11.362	17.062	16.388	11.381	13.299	10.061	11.661	15.979	14.764	26.427	29.911	32.086	29.583	31.027	29.171	28.709	28.94	30.728	30.901	26.115	24.132	24.574	25.634	27.637	38.772	45.61	39.273	39.774
25	23.849	19.858	25.931	26.124	20.456	26.942	28.151	23.312	26.942	24.426	32.949	29.444	27.961	28	26.844	12.089	12.3	13.359	15.746	12.878	14.655	17.043	15.156	11.169	16.85	12.663	11.141	11.969	15.13	15.381	34.511	29.449	29.93	27.409	31.662	26.767	29.94	27.863	28.44	26.363	25.422	27.637	24.517	25.422	23.977	43.684	39.215	40.564	38.445
26	22.731	23.271	23.83	25.912	27.184	25.905	22.717	29.572	24.656	22.832	25.939	31.947	28.905	27.884	26.555	13.224	13.09	15.207	17.401	12.936	22.897	17.274	14.809	14.385	14.096	12.085	12.721	13.396	13.415	14.861	27.967	27.697	30.122	31.104	31.374	28.902	24.998	25.46	27.806	28.325	28.06	24.883	25.903	26	26.327	44.705	44.435	45.918	39.504
27	25.102	26.028	27.107	22.538	25.43	27.959	28.478	24.196	29.111	18.915	28.019	22.415	26.979	24.495	24.61	14.206	12.897	14.187	15.361	13.398	14.096	13.191	19.45	15.175	13.095	13.723	12.837	11.468	16.268	18.349	27.158	28.352	31.239	31.297	28.602	26.517	28.748	26.421	26.056	25.652	24.497	25.961	25.711	26.577	22.514	38.272	42.991	41.161	46.843
28	23.675	26.953	25.584	22.827	23.425	23.543	22.275	29.534	22.871	22.525	23.571	24.379	26.921	26.864	27.884	15.476	13.205	13.417	11.954	14.976	11.824	13.942	16.908	21.356	12.902	12.413	13.184	14.032	15.805	15.998	30.103	27.736	28.948	31.297	33.76	25.383	22.825	23.921	23.883	23.421	22.668	24.016	23.689	23.226	19.586	41.238	43.125	44.474	42.413
29	24.986	20.205	20.764	23.058	26.741	20.451	20.086	21.91	23.12	18.358	23.571	26.921	26.864	22.916	27.229	13.84	14.36	13.494	13.609	13.167	20.798	13.885	12.806	18.911	14.135	12.432	12.509	10.466	18.195	16.557	31.335	28.255	30.95	32.836	30.43	25.498	23.594	24.883	20.921	22.556	23.958	23.65	22.841	22.321	20.896	38.618	39.697	44.878	39.369
30	23.81	22.846	23.521	23.136	22.924	20.662	22.429	17.033	20.374	19.548	21.317	24.572	24.129	26.344	24.09	12.762	16.189	13.301	12.397	14.456	14.443	14.713	10.88	10.919	15.175	12.625	11.622	11.276	14.591	12.509	28.063	29.564	29.237	32.875	27.543	20.095	19.729	21.095	19.268	21.037	20.299	17.506	19.818	22.495	21.782	42.047	41.161	40.487	40.41
31	24.022	25.796	22.499	19.357	25.449	26.903	16.38	23.293	18.473	21.027	22.646	23.744	26.228	27.364	26.44	11.915	13.494	14.302	13.417	13.667	12.883	12.864	14.039	8.454	10.611	13.261	10.852	13.28	7.845	12.528	27.774	29.545	27.004	27.947	31.297	19.229	18.614	23.498	19.556	20.806	19.201	17.757	20.858	17.776	19.047	40.024	38.503	39.312	37.655
32	21.632	24.427	22.596	23.945	24.582	20.336	21.488	21.066	19.625	21.43	21.703	26.902	25.708	27.114	26.151	10.433	7.411	12.608	11.088	11.915	12.286	10.11	9.725	9.263	9.012	12.413	6.515	11.892	11.237	11.68	25.965	27.293	27.37	27.043	28.679	18.345	18.056	17.479	23.402	19.402	17.564	18.007	16.543	17.872	17.256	40.949	41.43	39.254	39.215
33	22.711	22.692	21.863	24.042	26.413	20.566	19.664	18.012	20.72	20.624	20.701	25.304	26.44	22.454	23.359	9.817	11.473	11.434	12.185	12.223	8.261	11.15	8.069	9.321	5.527	11.006	9.502	10.138	11.43	13.164	25.849	27.928	25.618	24.329	27.332	17.595	16.749	17.979	16.922	17.806	18.778	16.986	18.258	15.638	16.505	38.387	41.315	38.118	37.636
34	20.07	23.945	20.938	25.411	27.512	18.915	17.033	20.989	21.757	18.3	20.701	22.454	23.359	24.399	22.646	9.009	10.048	8.335	9.933	10.914	8.127	7.799	6.663	11.439	8.743	13.261	11.121	7.806	16.923	11.141	23.405	21.596	23.944	25.041	22.558	16.71	13.307	13.499	17.96	15.71	15.311	16.871	14.348	17.718	16.389	40.294	35.787	36.866	39.061
35	28.283	25.064	25.7	22.249	25.815	17.686	19.548	18.339	24.1	17.187	21.298	26.267	24.418	20.586	21.626	8.2	7.507	7.411	7.565	8.758	6.355	5.122	6.528	8.743	8.011	8.5	7.517	10.601	15.998	4.028	23.886	27.389	21.827	20.402	20.576	12.98	14.999	16.595	16.133	13.903	16.524	14.618	16.64	14.945	17.892	40.506	39.1	41.103	34.362
36	28.881	23.695	24.003	21.323	19.993	19.491	17.763	19.721	19.606	20.47	20.201	22.319	23.378	24.726	25.13	5.756	5.332	7.257	7.026	7.969	4.525	3.466	3.351	3.197	2.985	8.577	7.44	6.091	9.888	7.517	19.325	17.4	21.076	18.131	14.878	12.461	12.768	10.768	12.961	12.038	13.751	13.385	16.158	14.386	13.77	36.75	41.219	38.329	36.076
37	28.495	24.524	24.235	24.273	25.989	17.82	17.82	21.046	18.223	15.804	21.876	24.071	26.767	24.764	26.883	4.678	5.197	7.296	7.45	6.179	2.927	2.022	2.638	2.484	1.926	7.96	7.363	5.725	7.575	6.283	15.321	14.744	15.764	15.013	15.937	10.884	9.749	10.884	12.672	12.018	12.422	12.441	14.367	12.075	15.08	38.137	37.366	35.633	33.11
38	23.155	23.155	23.521	24.929	23.502	19.587	19.606	17.897	19.625	18.32	21.356	20.528	22.223	25.111	24.11	4.273	5.486	3.426	5.236	5.294	1.598	2.215	1.675	1.675	1.502	5.532	3.797	3.971	2.737	1.87	14.301	12.434	13.512	15.109	13.858	10.288	12.23	10.095	10.538	11.538	14.483	11.864	11.478	12.981	12.653	33.495	36.692	37.116	33.765
39	28.688	25.893	24.967	24.62	26.085	19.894	16.534	19.472	18.204	21.526	21.683	24.302	23.089	23.917	22.088	3.272	3.6	3.811	4.889	2.541	1.348	1.213	0.693	1.098	2.003	2.024	1.503	1.6	1.812	1.561	13.377	13.454	10.451	9.893	11.125	8.48	8.057	10.442	10.98	8.346	10.978	11.96	11.035	11.575	12.307	32.821	32.031	35.498	32.089
40	27.358	24.717	24.697	25.276	23.116	17.532	14.882	18.435	17.763	17.801	20.971	20.124	22.665	21.837	22.665	2.984	2.714	1.636	1.829	2.464	1.04	1.56	1.117	1.001	1.29	1.581	1.85	1.677	0.848	1.022	9.893	8.835	10.605	6.814	8.758	7.173	6.538	7.576	7.384	8.519	9.61	9.302	10.342	10.535	10.4	29.855	32.513	32.57	29.951
41	27.3	22.422	23.001	22.384	21.805	18.339	18.051	17.724	19.837	18.8	20.432	23.879	20.663	20.393	20.143	2.002	2.907	2.502	2.984	1.636	0.963	1.425	0.828	1.329	1.733	0.752	0.655	1.002	0.463	0.925	7.064	6.563	6.698	7.391	7.41	6.923	7.942	8.038	7.711	7.749	7.954	7.222	8.955	10.881	8.512	30.586	29.103	28.68	20.975
42	21.651	18.663	21.728	18.47	23.039	13.308	15.9	21.565	15.401	15.458	20.047	24.225	20.971	20.509	23.051	0.828	1.444	1.463	1.752	1.617	1.098	1.348	1.155	1.136	0.597	0.289	0.732	0.52	0.366	0.81	5.947	6.236	6.506	5.235	6.814	5.673	5.73	6.788	6.5	7.826	9.822	9.803	8.07	9.552	7.665	20.07	28.314	26.06	29.373
43	25.931	21.535	24.466	16.696	20.282	11.138	17.647	12.981	14.575	16.361	19.931	22.184	20.836	22.377	16.927	0.789	0.712	0.616	0.866	0.462	0.751	0.443	0.424	1.271	0.558	0.617	0.251	0.52	0.251	0.366	3.465	2.964	3.08	3.522	3.83	5.538	5.98	7.134	6.653	7.076	6.702	8.031	6.105	7.28	3.852	23.248	19.839	25.405	18.972
[truncated: 15 more columns]
