# Supplementary material for: Spatiotemporal recruitment of RhoGTPase protein GRAF inhibits actomyosin ring constriction in Drosophila cellularization
Source: eLife. 2021 Apr 9;10:e63535. doi: 10.7554/eLife.63535 (PMC8081525; doi:10.7554/eLife.63535)
Supplement: Figure 9—source data 1. [file elife-63535-fig9-data1.xlsx]

## Sheet: Figure 9-source data
Figure 9-source data 9B
Time(min)	Control															rok i															GrafCR57;rok i															GrafCR57
1						28.958	30.033	29.649	31.589	30.321	24.142	19.975	25.064	20.685	24.719						41.113	35.736	35.717	38.329	37.849	41.544	32.37	35.813	48.449	45.968											30.133	32.577	33.135	24.687	35.232	22.887	19.461	24.331	25.736
2						26.98	28.9	31.569	32.126	29.668	24.45	22.856	28.906	28.56	21.588						32.914	34.949	35.756	36.773	36.274	33.889	45.506	39.813	40.121	34.909											28.132	37.406	31.326	25.111	31.538	23.754	22.753	23.465	23.542
3						30.475	35.103	35.813	29.169	29.553	24.565	28.272	27.484	26.332	24.796						38.771	33.298	34.949	41.651	37.196	42.795	40.967	42.448	36.428	34.64											28.286	29.556	32.731	30.652	26.9	25.698	24.119	23.619	22.426
4	35.803	33.359	35.341	38.903	29.432	32.069	34.258	33.759	32.722	34.642	27.043	30.442	24.719	25.218	26.793						34.2	47.834	37.1	39.423	37.638	32.447	41.66	46.564	48.892	40.006											36.925	35.213	28.536	32.173	29.382	24.562	25.967	24.504	24.639
5	32.031	38.595	38.749	32.858	35.515	27.729	31.358	36.101	35.698	33.835	29.943	27.561	27.773	25.602	27.216						39.539	33.567	34.527	37.503	37.81	39.525	40.121	45.141	36.063	36.313						28.096	26.268	26.172	27.173	29.905	28.305	28.709	35.617	37.695	33.75	23.792	25.833	23.542	26.064
6	33.34	31.299	28.701	35.726	33.725	32.549	36.985	37.618	32.875	38.329	26.409	29.636	28.253	30.903	28.752	47.759	51.791	47.779	47.837	50.691	40.211	35.64	38.502	36.85	40.691	32.87	41.525	38.602	44.756	38.121	33.441	23.713	24.079	26.911	18.493	28.558	24.652	24.613	28.732	27.173	37.81	36.329	34.289	28.324	30.71	26.526	25.332	26.295	26.275
7	36.285	32.839	33.224	34.225	37.902	40.038	35.333	32.453	35.852	36.121	27.427	28.118	30.653	28.08	28.368	43.381	42.956	47.547	50.093	55.147	42.323	37.772	37.196	37.542	44.32	34.178	38.448	41.583	43.91	35.659	20.997	23.27	27.142	22.037	27.123	24.883	24.113	27.577	22.881	24.209	30.922	31.037	31.961	30.518	35.905	24.543	24.678	25.236	24.062
8	38.826	35.38	30.144	34.591	28.2	37.177	32.971	34.469	34.181	37.676	26.447	24.546	25.41	23.182	25.871	48.685	49.148	47.663	49.283	46.756	39.059	45.261	40.249	42.4	43.341	29.773	35.909	42.275	45.487	48.026	29.319	31.649	31.63	33.113	32.362	25.729	27.731	26.384	26.23	24.863	28.132	38.426	32.865	30.806	30.094	25.351	24.485	23.715	26.949
9	36.978	33.34	33.455	32.454	39.807	39.231	35.583	31.435	39.251	30.763	23.163	29.405	25.813	25.18	28.157	45.194	46.506	49.322	48.801	42.995	42.035	45.664	39.615	41.056	36.658	36.774	32.678	44.179	38.217	46.295	42.591	28.567	31.149	31.033	25.716	22.785	25.845	25.364	26.441	25.364	31.749	31.133	29.209	37.868	30.96	25.563	22.483	27.219	24.735
10	30.548	31.896	34.264	34.09	33.07	32.376	32.568	32.28	37.023	33.759	26.543	27.523	26.985	26.697	25.602	45.31	44.5	45.985	46.544	45.599	41.689	44.935	41.171	40.998	45.031	31.774	44.526	43.468	38.39	40.506	38.777	27.335	30.089	28.991	29.839	31.406	26.865	29.944	21.881	27.577	32.134	31.73	35.867	28.998	30.729	23.33	23.619	23.965	22.002
11	32.55	33.571	34.514	33.975	33.07	30.878	35.487	32.261	30.648	34.277	24.488	23.24	27.216	24.296	27.331	51.694	46.428	48.975	43.226	47.277	42.669	47.201	43.878	47.431	43.379	45.468	47.738	45.737	43.314	39.198	30.821	30.474	30.571	33.441	28.991	28.308	27.153	30.502	24.729	31.965	29.69	31.21	31.461	28.863	40.177	22.252	25.987	21.906	21.694
12	30.587	31.723	33.07	32.146	32.531	33.759	30.821	34.296	33.835	31.185	26.505	22.568	26.37	28.522	26.716	50.421	42.455	50.749	44.577	53.237	40.729	47.143	42.746	42.88	40.672	31.447	37.948	44.699	39.775	42.698	44.402	29.897	34.481	32.516	37.428	26.711	28.808	28.674	30.367	30.637	30.191	32.384	31.287	31.461	27.324	22.849	20.462	18.999	21.232
13	35.919	30.548	28.393	31.357	28.547	31.896	34.411	31.013	32.51	29.688	27.35	28.752	24.623	28.522	26.947	53.199	45.657	48.762	43.477	38.964	41.19	47.162	39.443	46.279	41.267	44.045	47.911	34.89	45.391	45.506	38.372	33.21	36.022	36.157	32.15	32.965	29.867	31.368	28.154	28.828	29.748	30.691	32.48	32.461	33.385	17.344	20.847	18.402	20.212
14	27.95	27.7	31.184	31.318	33.205	30.033	32.28	29.246	32.818	33.816	25.218	25.583	27.619	24.411	26.198	51.212	55.861	47.296	48.222	49.669	46.586	41.421	45.818	44.474	48.814	47.488	41.314	39.352	44.218	36.851	35.271	35.194	34.077	34.25	32.651	26.846	32.484	26.846	28.539	30.406	32.596	36.887	40.524	33.904	36.29	21.309	20.539	21.771	18.961
15	32.3	32.685	30.048	28.527	29.393	32.03	31.377	27.902	30.84	35.333	25.007	27.888	26.87	26.889	26.428	50.903	48.994	45.368	39.812	45.908	42.227	49.678	43.571	44.09	41.497	44.929	46.372	42.564	39.679	45.737	34.982	35.521	35.406	32.555	37.082	30.771	28.982	27.769	31.522	33.196	35.617	35.232	35.521	32.711	28.536	18.056	17.844	14.88	13.783
16	34.802	30.279	30.991	31.28	33.994	30.801	26.097	27.748	26.73	29.611	25.737	27.388	27.119	26.121	22.164	48.897	51.309	48.917	50.884	48.434	47.143	41.901	41.824	42.496	49.659	45.199	43.16	42.006	45.199	33.62	38.989	36.716	37.717	35.213	35.483	32.061	34.255	32.253	39.412	33.273	34.866	38.792	36.598	34.559	39.658	12.801	11.973	13.821	12.782
17	32.57	28.816	32.127	32.3	33.109	28.651	30.859	27.556	31.262	30.321	28.656	27.753	26.524	27.484	24.431	48.242	50.498	49.823	44.538	47.759	47.297	43.648	46.356	43.322	41.824	47.18	42.66	34.39	42.775	47.141	35.579	37.756	39.374	35.81	37.505	39.335	34.428	34.447	30.733	34.832	36.483	35.867	42.91	34.097	34.231	10.164	11.049	12.916	13.494
18	33.032	32.724	28.893	28.604	30.664	33.567	28.497	26.673	29.188	29.726	26.351	24.93	22.894	24.911	27.58	46.139	49.708	48.28	48.782	49.553	45.261	45.818	43.61	43.917	51.329	42.814	50.065	46.353	47.238	34.082	33.383	38.43	36.33	39.316	35.772	33.408	34.235	36.41	33.081	36.102	38.311	40.6	38.195	40.158	35.963	12.685	14.033	17.344	14.822
19	32.916	29.894	29.663	31.877	28.181	30.34	27.038	28.228	27.594	27.883	27.427	25.16	24.258	27.388	23.778	44.789	43.419	49.052	50.865	47.779	47.661	50.695	50.388	45.837	47.239	46.237	40.89	40.044	47.872	36.313	35.733	36.407	39.239	38.488	39.124	34.909	39.239	35.91	40.182	31.695	38.676	35.213	40.293	35.155	36.733	15.9	17.498	19.577	19.192
20	31.992	30.741	27.565	26.506	31.184	29.15	26.788	27.191	30.725	25.905	27.696	24.584	26.466	24.354	24.239	48.434	44.422	49.939	46.563	45.001	49.524	47.239	49.063	51.176	44.051	45.776	38.602	46.949	43.064	37.121	43.227	39.355	42.283	39.605	38.16	34.216	35.044	39.47	35.178	33.466	38.907	39.985	36.271	39.484	39.331	15.476	13.898	12.839	19.115
21	30.375	31.703	30.029	28.854	33.032	27.614	26.654	29.38	26.826	25.021	23.97	23.182	22.03	24.68	25.141	50.286	49.245	48.029	44.307	45.715	46.74	44.877	42.784	50.676	50.695	44.295	42.891	46.718	42.872	46.93	34.25	41.204	42.225	37.139	35.464	34.736	36.429	38.565	36.314	35.871	45.296	42.467	46.97	38.619	37.926	14.63	14.418	13.282	15.765
22	30.702	27.95	30.317	28.258	29.393	22.755	26.769	26.404	26.269	27.364	25.199	22.779	21.012	25.103	24.68	48.666	47.528	49.804	46.158	46.718	48.391	49.121	49.274	45.856	44.647	43.641	45.218	45.757	45.718	46.237	38.815	39.066	37.737	36.215	35.502	32.734	34.562	34.081	35.178	36.237	38.888	37.926	48.22	46.565	37.926	15.303	10.799	12.705	11.184
23	27.411	30.799	30.298	30.202	30.606	26.193	24.196	26.481	25.693	25.847	27.773	26.198	26.582	25.237	22.011	48.049	44.982	48.396	46.236	46.39	50.676	49.428	48.91	48.986	42.707	45.622	43.083	42.756	42.41	39.583	41.243	41.377	39.644	29.665	38.18	38.238	39.681	32.503	35.063	39.643	42.063	50.991	40.293	46.893	40.273	13.398	12.416	13.282	18.191
24	30.606	30.414	28.45	28.065	29.855	24.522	24.618	25.674	29.803	26.423	25.66	23.874	24.277	27.427	22.721	46.949	42.262	44.885	50.846	52.62	44.474	46.951	52.04	49.255	48.545	45.795	41.14	43.102	43.564	48.141	35.444	38.237	37.91	39.047	43.747	28.751	35.659	35.967	36.294	31.58	42.14	39.523	43.564	42.217	42.486	11.28	14.283	15.592	12.512
25	30.144	29.49	28.219	27.911	27.95	29.534	23.984	25.521	23.677	24.215	22.875	25.525	24.757	24.623	24.392	49.437	51.116	48.55	48.396	50.209	49.985	49.947	47.009	46.432	46.183	42.121	45.372	42.987	38.505	45.141	39.451	38.334	38.353	33.807	36.176	34.524	40.952	37.026	37.103	36.429	44.949	48.24	49.202	44.68	42.64	12.57	16.728	14.745	13.59
26	28.72	24.831	25.428	29.547	24.081	23.255	27.326	25.348	22.755	24.138	25.18	25.18	24.162	22.664	25.698	47.142	51.444	44.037	53.122	48.801	50.542	52.059	46.913	48.967	50.215	46.314	42.66	42.66	46.949	37.505	37.525	33.402	41.955	36.253	37.563	37.391	34.024	38.219	28.289	38.257	40.119	49.875	41.428	37.791	40.985	14.129	15.169	15.65	12.3
27	28.604	26.622	28.893	28.046	26.583	21.699	23.005	24.791	26.077	24.599	22.856	24.219	24.008	22.606	23.221	53.064	45.233	53.835	49.245	46.39	52.558	46.989	47.489	50.83	49.178	46.045	50.026	46.353	43.391	47.834	36.022	37.949	38.122	37.602	36.947	35.39	33.158	32.965	34.986	34.351	37.31	38.657	42.14	44.757	43.525	13.802	12.685	13.359	15.823
28	29.278	25.505	25.351	24.928	28.296	23.773	21.046	24.061	24.119	21.661	21.857	24.738	23.912	23.95	24.008	53.315	47.759	46.776	51.347	42.976	49.563	46.893	49.812	47.988	44.013	48.392	46.814	46.43	43.987	45.006	37.891	40.761	37.717	39.085	44.44	32.542	37.565	33.504	33.87	37.334	36.887	45.565	44.237	40.389	41.159	12.089	12.3	13.359	15.746
29	26.352	29.066	25.678	25.582	25.601	21.469	23.101	23.965	22.275	23.639	26.678	24.431	24.219	23.797	24.834	45.927	51.116	47.74	43.863	41.703	48.487	48.161	51.483	46.356	49.716	45.776	41.448	46.757	39.736	41.891	44.325	41.917	37.332	36.234	35.926	33.754	38.161	41.413	30.829	41.067	40.716	38.368	47.701	42.159	39.215	13.224	13.09	15.207	17.401
30	29.066	26.891	28.181	26.333	25.794	23.485	22.583	24.388	30.552	21.296	24.603	25.122	22.971	24.104	24.066	40.738	46.621	43.014	51.849	44.577	51.137	49.274	48.334	49.563	51.368	44.603	44.372	51.565	42.083	43.141	37.12	43.805	47.31	40.761	40.511	37.468	37.949	39.239	37.699	42.26	35.521	37.368	40.754	42.236	46.373	14.206	12.897	14.187	15.361
31	27.565	28.739	27.18	28.258	24.716	23.351	20.701	22.41	22.41	19.856	24.968	23.278	24.181	23.97	26.774	43.921	41.606	42.976	42.86	40.179	47.239	49.831	47.258	49.659	49.063	43.756	42.621	38.159	40.467	37.121	40.433	36.581	39.759	36.465	38.565	39.354	34.062	32.484	38.661	39.489	35.367	35.405	42.717	40.812	35.944	15.476	13.205	13.417	11.954
32	28.854	28.008	25.621	24.466	25.082	20.873	22.775	21.987	23.389	22.832	24.392	25.16	26.294	25.948	26.159	41.066	41.645	52.601	47.142	38.751	47.124	50.695	49.793	49.178	47.623	41.891	44.795	44.391	45.218	41.621	38.526	36.889	41.454	36.716	43.361	40.759	42.337	37.488	41.298	38.354	34.039	35.501	41.005	43.66	37.56	13.84	14.36	13.494	13.609
33	23.561	26.487	24.119	27.103	25.486	22.871	21.488	22.755	20.24	22.006	22.856	26.102	25.084	23.451	22.529	39.446	42.108	44.037	38.289	40.815	49.831	49.14	47.201	48.794	47.239	48.199	38.332	43.006	38.659	43.487	42.302	37.139	38.546	39.355	41.589	40.644	37.622	34.466	35.948	38.642	42.121	31.114	31.191	37.445	41.293	12.762	16.189	13.301	12.397
34	27.584	26.487	25.794	23.426	24.1	21.315	20.317	21.834	21.968	19.203	25.89	25.641	21.569	24.757	25.276	38.481	43.323	39.369	38.559	44.692	50.542	49.505	49.947	47.93	47.143	42.718	46.661	43.314	53.7	36.813	38.854	36.966	35.271	36.889	39.008	38.546	42.857	36.833	37.083	38.026	33.058	34.655	39.735	36.059	40.581	11.915	13.494	14.302	13.417
35	23.484	26.506	25.967	26.102	25.794	20.509	20.758	16.591	21.68	20.009	24.469	25.871	25.506	25.621	23.989	43.477	44.461	40.372	38.886	42.127	49.044	51.387	46.759	48.007	47.431	43.679	49.276	45.237	38.352	42.044	37.505	42.649	38.584	37.987	40.549	35.448	39.22	39.72	37.064	36.429	37.868	33.885	32.981	34.328	45.392	10.433	7.411	12.608	11.088
36	26.294	23.08	26.737	24.1	27.103	14.652	19.184	21.43	22.026	21.45	27.773	26.505	22.433	25.583	23.835	48.087	35.974	36.61	41.336	45.753	50.331	50.58	47.028	48.852	48.602	43.218	41.506	43.218	43.352	38.294	36.061	37.217	45.076	41.975	37.236	37.834	37.815	38.123	37.064	37.661	35.097	35.347	32.269	41.082	42.602	9.817	11.473	11.434	12.185
37	20.192	20.558	26.121	22.368	25.89	21.104	20.739	20.336	17.609	19.049	24.565	26.274	25.295	24.968	21.838	54.453	51.849	58.407	48.647	52.639	45.568	48.756	48.276	45.299	44.128	41.083	35.697	41.102	39.91	41.16	34.308	37.062	36.851	38.719	36.369	34.216	34.986	36.006	34.678	38.892	34.347	36.002	40.004	39.407	39.677	9.009	10.048	8.335	9.933
38	19.499	23.907	24.639	19.692	20.154	18.915	20.317	20.374	16.265	19.625	21.838	22.856	24.661	25.449	25.564	58.658	52.987	51.251	55.34	51.405	48.641	50.715	48.737	49.812	44.992	41.871	43.756	34.89	31.774	39.736	38.931	35.098	36.061	37.891	35.309	40.798	34.659	44.935	35.679	35.91	34.732	34.809	35.232	37.098	35.213	8.2	7.507	7.411	7.565
39	23.253	17.748	22.984	19.981	20.231	20.24	19.721	20.144	17.724	15.535	22.644	24.796	23.451	24.968	23.739	63.943	72.218	63.885	64.907	60.394	46.548	47.949	46.989	51.828	44.397	40.16	43.795	43.064	37.236	33.12	36.253	40.241	39.509	40.568	34.732	42.972	35.371	40.644	37.872	34.466	35.117	27.882	31.403	41.909	38.138	5.756	5.332	7.257	7.026
40	17.998	23.58	17.478	20	18.729	18.147	18.147	14.997	18.78	19.606	24.661	22.164	24.488	25.218	25.026	55.629	37.826	65.042	47.509	37.652	46.471	48.641	42.534	39.039	41.286	42.872	41.525	37.121	46.141	31.62						35.91	33.273	34.716	32.542	37.411	43.602	39.869	46.508	33.866	34.405	4.678	5.197	7.296	7.45
41	18.498	17.055	22.271	18.229	18.113	13.903	14.671	18.339	18.972	18.108	23.048	23.125	21.934	25.237	23.95	66.392	42.031	52.562	58.715	44.114	38.29	47.393	42.265	48.967	39.423	36.736	42.468	28.87	36.717	33.851	37.428	37.139	33.383	35.098	44.845	35.775	33.427	29.963	34.678	34.774	35.675	44.41	37.098	41.87	34.424	4.273	5.486	3.426	5.236
42	16.612	20.135	15.784	21.675	17.382	16.783	17.206	14.517	14.306	15.285	25.564	25.372	24.911	22.913	24.661	63.923	53.315	47.509	55.166	69.189	42.746	41.517	45.664	37.618	43.59	30.947	34.063	32.851	33.312	41.506	35.425	32.998	36.196	42.013	32.381	32.792	36.525	31.291	31.387	36.641	43.641	35.732	32.942	39.407	39.119	3.272	3.6	3.811	4.889
43	16.285	17.882	16.708	16.574	18.729	14.21	16.783	15.881	16.13	14.46	24.315	21.838	18.515	19.418	21.377	48.029	42.648	33.987	59.313	61.3	35.41	40.499	40.652	38.694	41.958	30.601	39.506	33.62	45.968	31.408	33.923	36.908	36.542	30.282	38.045	33.215	33.735	32.811	33.254	37.661	37.522	40.042	31.364	36.348	37.079	2.984	2.714	1.636	1.829
44	13.744	16.343	17.036	16.227	18.595	14.191	15.017	11.771	12.731	13.768	21.78	21.185	19.821	19.629	19.552	42.937	50.286	57.558	44.5	46.776	32.434	38.29	30.686	36.754	37.676	26.427	34.409	35.736	36.351	30.639	35.849	36.234	34.346	34.982	37.024	34.87	29.309	36.718	30.444	30.31	41.832	31.615	33.885	33.789	39.484	2.002	2.907	2.502	2.984
45	15.014	11.992	14.456	17.536	13.994	11.061	10.35	13.615	9.179	11.963	17.689	18.4	16.133	19.533	18.15	42.648	62.843	49.688	34.103	57.057	43.206	43.802	42.035	41.766	40.115	28.042	36.986	30.216	42.987	58.643	36.234	33.46	29.877	34.423	30.224	35.813	32.734	29.29	28.905	29.771	35.982	32.192	35.232	32.134	40.677	0.828	1.444	1.463	1.752
46	12.088	13.474	13.879	13.648	16.959	8.776	6.414	7.681	7.259	5.07	16.594	16.364	13.79	12.772	13.368	57.886	55.359	50.286	33.563	64.174	45.588	38.022	42.688	34.469	33.797	29.389	36.39	34.851	51.392	41.891	30.629	28.799	35.098	32.709	29.242	33.677	32.407	29.232	26.672	28.693	37.406	35.905	33.981	36.079	27.497	0.789	0.712	0.616	0.866
47	15.245	12.512	15.149	16.477	15.958	7.412	6.471	5.722	5.665	4.916	15.961	14.213	11.255	12.542	11.293	51.579	57.635	41.355	50.942	54.781	45.395	39.577	40.019	37.446	32.933	35.524	29.754	65.394	44.449	34.851	29.376	25.177	33.768	30.34	30.84	31.214	26.903	25.556	26.518	29.116	30.883	35.444	37.772	29.286	29.902
[truncated: 15 more columns]
